# Supplementary material for: Insular holobionts: persistence and seasonal plasticity of the Balearic wall lizard ( Podarcis lilfordi) gut microbiota
Source: PeerJ journal article supplement (doi:10.7717/peerj.14511), 2023-01-03

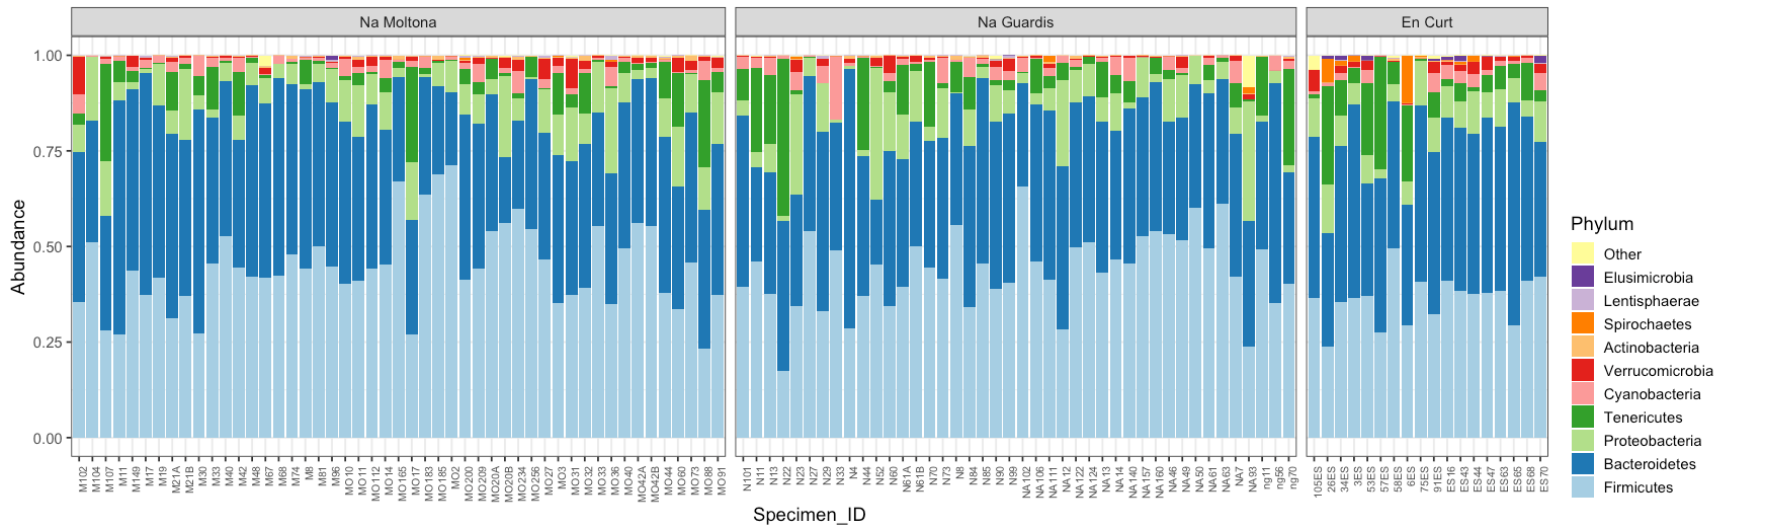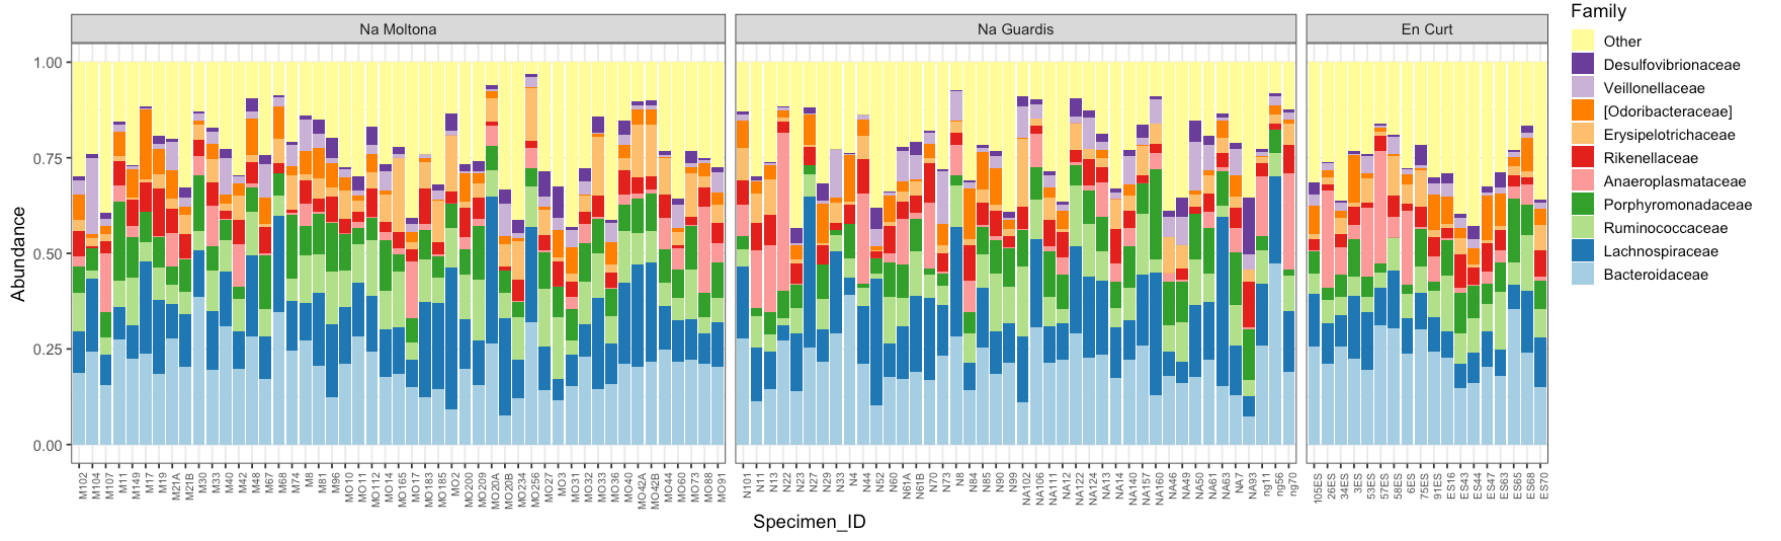

Supplement: Figure_S2.pdf [file Figure_S2.pdf]
