# Supplementary material for: Insular holobionts: persistence and seasonal plasticity of the Balearic wall lizard (Podarcis lilfordi) gut microbiota
Source: PeerJ. 2023 Jan 3;11:e14511. doi: 10.7717/peerj.14511 (PMC9817956; doi:10.7717/peerj.14511)
Supplement: Supplemental Information 1 [file peerj-11-14511-s001.xlsx]

## Sheet: sampledata_2017-18
Table S1: Sample metadata.
Specimen_ID	Islet	Sampling_date	Season_Year	Life_Stage	Sex	Weight _gr	SVL_mm	LAT	LON		Islet	Season_Year	Freq_timepoint_islet
MO11	Na Moltona	18.10.17	Autumn-17	Adult	F	6.4	65	501017	4.35064e+06		En Curt	Spring-17	10
MO112	Na Moltona	20.10.17	Autumn-17	Adult	F	6.5	66	501054	4.35064e+06		En Curt	Autumn-18	8
MO165	Na Moltona	20.10.17	Autumn-17	Adult	M	7.6	65	500977	4350590		Na Guardis	Spring-18	7
MO183	Na Moltona	24.10.17	Autumn-17	Adult	F	5.6	62	501017	4.35064e+06		Na Guardis	Spring-17	14
MO185	Na Moltona	24.10.17	Autumn-17	Adult	M	8.6	71	501018	4.35064e+06		Na Guardis	Autumn-18	18
MO2	Na Moltona	18.10.17	Autumn-17	Adult	M	12.3	75	501054	4.35064e+06		Na Guardis	Autumn-17	3
MO200	Na Moltona	24.10.17	Autumn-17	Adult	F	5.8	64	501043	4.35062e+06		Na Moltona	Spring-18	7
MO209	Na Moltona	24.10.17	Autumn-17	Adult	M	10.3	73	500984	4350580		Na Moltona	Spring-17	13
MO20A	Na Moltona	18.10.17	Autumn-17	Adult	M	7.7	71	501049	4.35063e+06		Na Moltona	Autumn-18	14
MO234	Na Moltona	24.10.17	Autumn-17	Adult	F	5.1	63	501042	4.35064e+06		Na Moltona	Autumn-17	15
MO256	Na Moltona	24.10.17	Autumn-17	Adult	F	5.4	62	501027	4350580
MO3	Na Moltona	18.10.17	Autumn-17	Adult	F	5.1	61	501028	4.35064e+06
MO40	Na Moltona	18.10.17	Autumn-17	Adult	F	6.2	65	501035	4.35061e+06
MO42A	Na Moltona	18.10.17	Autumn-17	Adult	M	6.7	63	501018	4350590
MO73	Na Moltona	18.10.17	Autumn-17	Adult	F	6.8	67	501057	4.35063e+06
M102	Na Moltona	12.04.17	Spring-17	Adult	F	7.1	68	501016	4350580
M104	Na Moltona	12.04.17	Spring-17	Adult	F	8.7	69	501032	4350580
M107	Na Moltona	12.04.17	Spring-17	Adult	M	10.9	78	501017	4.35064e+06
M11	Na Moltona	10.04.17	Spring-17	Adult	F	8	69	500999	4350590
M19	Na Moltona	10.04.17	Spring-17	Adult	M	9.8	70	501028	4.35064e+06
M21A	Na Moltona	10.04.17	Spring-17	Adult	F	6	61	501022	4.35064e+06
M40	Na Moltona	10.04.17	Spring-17	Adult	F	5.6	64	500991	4350590
M48	Na Moltona	11.04.17	Spring-17	Adult	F	6.5	65	501060	4.35063e+06
M68	Na Moltona	11.04.17	Spring-17	Subadult	F	4.4	53	501006	4350580
M74	Na Moltona	11.04.17	Spring-17	Adult	F	7.8	65	501023	4.35063e+06
M8	Na Moltona	10.04.17	Spring-17	Adult	F	5.2	62	501035	4.35061e+06
M81	Na Moltona	11.04.17	Spring-17	Adult	F	6.2	63	500984	4350580
M96	Na Moltona	12.04.17	Spring-17	Adult	F	5.7	62	501012	4.35065e+06
MO10	Na Moltona	25.10.18	Autumn-18	Adult	F	4.9	60	501042	4.35064e+06
MO14	Na Moltona	25.10.18	Autumn-18	Adult	F	7.4	68	501043	4.35062e+06
MO17	Na Moltona	25.10.18	Autumn-18	Adult	F	7.4	68	500984	4350580
MO20B	Na Moltona	25.10.18	Autumn-18	Subadult	F	3.9	50	501023	4350580
MO27	Na Moltona	25.10.18	Autumn-18	Adult	M	13.2	77	501022	4.35064e+06
MO31	Na Moltona	25.10.18	Autumn-18	Adult	F	6.6	65	501043	4.35061e+06
MO32	Na Moltona	25.10.18	Autumn-18	Adult	M	10.2	71	501029	4.35062e+06
MO33	Na Moltona	25.10.18	Autumn-18	Adult	F	6.6	66	501005	4350590
MO36	Na Moltona	25.10.18	Autumn-18	Adult	M	7.8	67	501005	4350570
MO42B	Na Moltona	25.10.18	Autumn-18	Adult	M	7.8	67	501052	4.35062e+06
MO44	Na Moltona	25.10.18	Autumn-18	Adult	F	6.3	66	501043	4.35061e+06
MO60	Na Moltona	26.10.18	Autumn-18	Adult	F	7.4	63	501054	4.35064e+06
MO88	Na Moltona	26.10.18	Autumn-18	Adult	F	6.8	68	500995	4350570
MO91	Na Moltona	26.10.18	Autumn-18	Adult	F	5.6	64	501023	4350580
M149	Na Moltona	02.05.18	Spring-18	Juvenile	M	2.9	47	501032	4350580
M17	Na Moltona	20.04.18	Spring-18	Juvenile	M	2.8	52	501035	4.35061e+06
M21B	Na Moltona	20.04.18	Spring-18	Adult	M	10.7	74	500984	4350580
M30	Na Moltona	20.04.18	Spring-18	Juvenile	M	2.1	46	501042	4.35065e+06
M33	Na Moltona	20.04.18	Spring-18	Adult	F	7.5	67	501023	4.35063e+06
M42	Na Moltona	20.04.18	Spring-18	Adult	M	9.2	72	501043	4.35061e+06
M67	Na Moltona	02.05.18	Spring-18	Juvenile	Unk	2.5	48	501002	4.35065e+06
ng11	Na Guardis	17.10.17	Autumn-17	Adult	F	4.3	59	500135	4351239
ng56	Na Guardis	17.10.17	Autumn-17	Subadult	F	3.9	54	500104	4351232
ng70	Na Guardis	17.10.17	Autumn-17	Adult	F	3.8	55	500104	4351240
N11	Na Guardis	04.04.17	Spring-17	Adult	M	7.2	63	500124	4351255
N13	Na Guardis	04.04.17	Spring-17	Adult	M	8.4	70	500127	4351246
N22	Na Guardis	04.04.17	Spring-17	Adult	F	6.4	63	500111	4351247
N27	Na Guardis	04.04.17	Spring-17	Adult	F	5	61	500152	4351262
N29	Na Guardis	04.04.17	Spring-17	Juvenile	Unk	2.2	45	500087	4351239
N44	Na Guardis	04.04.17	Spring-17	Juvenile	F	2.3	48	500104	4351240
N61A	Na Guardis	04.04.17	Spring-17	Adult	M	8.2	69	500140	4351245
N70	Na Guardis	05.04.17	Spring-17	Adult	F	4.6	58	500123	4351231
N73	Na Guardis	05.04.17	Spring-17	Adult	F	6.2	64	500089	4351246
N8	Na Guardis	05.04.17	Spring-17	Adult	F	5.9	62	500115	4351229
N84	Na Guardis	05.04.17	Spring-17	Adult	F	6.1	62	500116	4351266
N85	Na Guardis	05.04.17	Spring-17	Adult	F	4.3	57	500115	4351276
N90	Na Guardis	06.04.17	Spring-17	Adult	F	6.7	62	500097	4351239
N99	Na Guardis	06.04.17	Spring-17	Adult	M	7.4	63	500097	4351239
NA102	Na Guardis	20.10.18	Autumn-18	Adult	F	4.1	56	500108	4351253
NA106	Na Guardis	20.10.18	Autumn-18	Subadult	M	5.3	61	500104	4351240
NA111	Na Guardis	20.10.18	Autumn-18	Adult	M	9	70	500097	4351239
NA12	Na Guardis	20.10.18	Autumn-18	Adult	M	8.2	66	500111	4351247
NA122	Na Guardis	20.10.18	Autumn-18	Adult	F	5.6	62	500140	4351245
NA124	Na Guardis	20.10.18	Autumn-18	Adult	M	9	65	500141	4351258
NA13	Na Guardis	20.10.18	Autumn-18	Adult	F	6.2	60	500108	4351253
NA14	Na Guardis	20.10.18	Autumn-18	Adult	M	6.4	63	500097	4351239
NA140	Na Guardis	20.10.18	Autumn-18	Adult	F	4.7	56	500135	4351239
NA157	Na Guardis	20.10.18	Autumn-18	Subadult	F	3.2	53	500129	4351236
NA160	Na Guardis	20.10.18	Autumn-18	Adult	F	6.2	64	500140	4351245
NA46	Na Guardis	20.10.18	Autumn-18	Adult	M	7.2	69	500141	4351258
NA49	Na Guardis	20.10.18	Autumn-18	Subadult	F	3.3	54	500133	4351261
NA50	Na Guardis	20.10.18	Autumn-18	Adult	F	5.1	62	500115	4351276
NA61	Na Guardis	20.10.18	Autumn-18	Adult	M	7.1	63	500108	4351253
NA63	Na Guardis	20.10.18	Autumn-18	Subadult	F	3.2	53	500104	4351232
NA7	Na Guardis	20.10.18	Autumn-18	Subadult	M	4.2	55	500141	4351258
NA93	Na Guardis	20.10.18	Autumn-18	Adult	M	6.7	64	500124	4351255
N101	Na Guardis	19.04.18	Spring-18	Adult	M	8.2	67	500115	4351276
N23	Na Guardis	17.04.18	Spring-18	Adult	F	6.2	59	500087	4351239
N33	Na Guardis	18.04.18	Spring-18	Adult	M	6.8	65	500129	4351236
N4	Na Guardis	17.04.18	Spring-18	Juvenile	M	1.4	39	500129	4351236
N52	Na Guardis	18.04.18	Spring-18	Adult	M	6.7	62	500096	4351256
N60	Na Guardis	18.04.18	Spring-18	Adult	F	6.2	59	500087	4351239
N61B	Na Guardis	18.04.18	Spring-18	Adult	M	8.3	66	500124	4351255
105ES	En Curt	01.04.17	Spring-17	Juvenile	M	1.9	43	503124	4347775
26ES	En Curt	01.04.17	Spring-17	Adult	M	6	66	503114	4347767
34ES	En Curt	01.04.17	Spring-17	Adult	M	8.5	75	503103	4347771
3ES	En Curt	01.04.17	Spring-17	Subadult	F	3.4	50	503101	4347755
53ES	En Curt	01.04.17	Spring-17	Adult	F	5.1	61	503115	4347786
57ES	En Curt	01.04.17	Spring-17	Subadult	M	3.3	52	503123	4347786
58ES	En Curt	01.04.17	Spring-17	Adult	F	5.5	65	503123	4347786
6ES	En Curt	01.04.17	Spring-17	Adult	M	7.5	64	503101	4347755
75ES	En Curt	01.04.17	Spring-17	Juvenile	Unk	1.1	37	503095	4347767
91ES	En Curt	01.04.17	Spring-17	Adult	M	5.5	62	503109	4347760
ES16	En Curt	16.10.18	Autumn-18	Adult	M	7.6	68	503129	4347778
ES43	En Curt	16.10.18	Autumn-18	Adult	M	6.4	65	503115	4347777
ES44	En Curt	11.10.18	Autumn-18	Adult	M	7.9	70	503115	4347783
ES47	En Curt	09.10.18	Autumn-18	Subadult	F	3.7	56	503109	4347760
ES63	En Curt	09.10.18	Autumn-18	Subadult	F	3.3	53	503124	4347775
ES65	En Curt	11.10.18	Autumn-18	Adult	M	9.1	72	503125	4347769
ES68	En Curt	09.10.18	Autumn-18	Subadult	F	4	54	503095	4347767
ES70	En Curt	09.10.18	Autumn-18	Subadult	F	4	55	503115	4347777
