# Supplementary material for: Insular holobionts: persistence and seasonal plasticity of the Balearic wall lizard (Podarcis lilfordi) gut microbiota
Source: PeerJ. 2023 Jan 3;11:e14511. doi: 10.7717/peerj.14511 (PMC9817956; doi:10.7717/peerj.14511)
Supplement: Supplemental Information 2 [file peerj-11-14511-s002.xlsx]

## Sheet: Sheet1
Table S2: Primers used for amplification of the region V3-V4 of 16S rRNA.
Primer name	full sequence 5'-3'
V3-V4-forward	TCGTCGGCAGCGTCAGATGTGTATAAGAGACAGCCTACGGGNGGCWGCAG
V3-V4-forward+1	TCGTCGGCAGCGTCAGATGTGTATAAGAGACAGNCCTACGGGNGGCWGCAG
V3-V4-forward+2	TCGTCGGCAGCGTCAGATGTGTATAAGAGACAGNNCCTACGGGNGGCWGCAG
V3-V4-forward+3	TCGTCGGCAGCGTCAGATGTGTATAAGAGACAGNNNCCTACGGGNGGCWGCAG
V3-V4-forward+4	TCGTCGGCAGCGTCAGATGTGTATAAGAGACAGNNNNCCTACGGGNGGCWGCAG
V3-V4-reverse	GTCTCGTGGGCTCGGAGATGTGTATAAGAGACAGGACTACHVGGGTATCTAATCC
V3-V4-reverse+1	GTCTCGTGGGCTCGGAGATGTGTATAAGAGACAGNGACTACHVGGGTATCTAATCC
V3-V4-reverse+2	GTCTCGTGGGCTCGGAGATGTGTATAAGAGACAGNNGACTACHVGGGTATCTAATCC
V3-V4-reverse+3	GTCTCGTGGGCTCGGAGATGTGTATAAGAGACAGNNNGACTACHVGGGTATCTAATCC
V3-V4-reverse+4	GTCTCGTGGGCTCGGAGATGTGTATAAGAGACAGNNNNGACTACHVGGGTATCTAATCC
