# Supplementary material for: Insular holobionts: persistence and seasonal plasticity of the Balearic wall lizard (Podarcis lilfordi) gut microbiota
Source: PeerJ. 2023 Jan 3;11:e14511. doi: 10.7717/peerj.14511 (PMC9817956; doi:10.7717/peerj.14511)
Supplement: Supplemental Information 3 [file peerj-11-14511-s003.xlsx]

## Sheet: Sheet1
Table S3: Abundance matrix of ASVs found in the negative PCR controls and mock communtiies
ASV	105ES	26ES	34ES	3ES	53ES	57ES	58ES	6ES	75ES	91ES	ES16	ES43	ES44	ES47	ES63	ES65	ES68	ES70	M102	M104	M107	M11	M149	M17	M19	M21A	M21B	M30	M33	M40	M42	M48	M67	M68	M74	M8	M81	M96	MO10	MO11	MO112	MO14	MO165	MO17	MO183	MO185	MO2	MO200	MO209
a41b72842290a9e865efc83d63ad2818	0	0	0	0	0	0	0	0	0	0	0	0	0	0	0	0	0	0	0	0	0	0	0	0	0	0	0	0	0	0	0	0	0	0	0	0	0	0	0	0	0	0	0	0	0	0	0	0	0
591ed1d6afd1e79ae33d6b6cd0c6b185	0	0	0	0	0	2	0	2	5	0	0	0	0	0	0	3	0	0	11	9	0	0	0	3	0	2	121	0	0	0	120	0	2	0	0	0	0	0	5301	0	0	9	0	0	3	4	0	2	0
be9e7e2786b3ae134712e7b6bedc2259	0	0	0	0	0	0	0	0	0	0	0	0	0	0	0	0	0	0	0	0	0	0	0	0	0	0	0	0	0	0	0	0	0	0	0	0	0	0	0	0	0	0	0	0	3	0	0	0	0
67dfacf96a38558ee3a659a1aa141fd5	0	0	0	0	0	0	0	0	0	0	0	0	0	0	0	0	0	0	0	0	0	0	0	0	0	0	0	0	0	0	0	0	0	0	0	0	0	0	0	0	0	0	0	0	0	0	0	0	0
dee86d463f6a6a4bad3f90c961d4150b	0	0	0	0	0	0	0	0	0	0	0	0	0	0	0	0	0	0	0	0	0	0	0	0	0	0	0	0	0	0	0	0	0	0	0	0	0	0	0	0	0	0	0	0	0	0	0	0	0
29fde6ffd0a41547e218d84de8f4fa03	0	0	0	0	0	0	0	0	0	0	0	0	0	0	0	0	0	0	0	0	0	0	0	0	0	0	0	0	0	0	0	0	0	0	0	0	0	0	0	0	0	0	0	0	0	0	0	0	0
a3a045b51f6ba1e973a9750f7061edbb	0	0	0	0	0	0	0	0	0	0	0	0	0	0	0	0	0	0	0	0	0	0	0	0	0	0	0	0	0	0	0	0	0	0	0	0	0	0	0	0	0	0	0	0	0	0	0	0	0
3876207928742711d18645217094065b	0	0	0	0	0	0	0	0	0	0	0	0	0	0	0	0	0	0	0	0	0	0	0	0	0	0	0	0	0	0	0	0	0	0	0	0	0	0	0	0	0	0	0	0	0	0	0	0	0
63dcf1c7a95370bfe7e6b7e39eb9343b	0	0	0	0	0	0	0	0	0	0	0	0	0	0	0	0	0	0	0	0	0	0	0	0	0	0	0	0	0	0	0	0	0	0	0	0	0	0	0	0	0	0	0	0	0	0	0	0	0
c804f27343fbd3504b0ef0766a3942fe	0	0	0	0	0	2	0	0	0	0	0	0	0	0	0	0	0	0	0	0	0	0	0	0	0	0	0	0	0	0	0	0	0	0	0	0	0	0	0	0	0	0	0	0	0	0	0	0	0
bfd4d446a5b960b55647a573d459ff58	0	0	0	0	0	0	0	0	0	0	0	0	0	0	0	0	0	0	0	0	0	0	0	0	0	0	0	0	0	0	0	0	0	0	0	0	0	0	0	0	0	0	0	0	0	0	0	0	0
e5084546676d262b0af7425e5b7a3a7e	0	0	0	0	0	0	0	0	2	0	0	0	0	0	0	0	3	0	0	0	2	0	0	0	0	0	0	0	0	0	0	0	0	0	2	0	0	0	0	0	0	16	0	2	0	0	0	2	0
e3e618b6c0b173feb5ba627d9a96d485	8	0	0	0	0	0	0	0	0	0	0	0	0	0	0	120	0	0	0	0	0	0	0	0	0	0	0	0	0	0	0	0	0	0	0	0	0	0	697	0	0	0	0	0	0	0	0	0	0
475aed25e995894a8ce8204c1c6b63d3	0	0	0	0	0	0	0	0	0	0	0	0	0	0	0	0	0	0	0	0	0	0	0	0	0	0	0	0	0	0	0	0	0	0	0	0	0	0	0	0	0	0	0	0	0	0	0	0	0
b05f5459e068b529b2c41e659efdef34	0	0	0	0	0	0	0	0	5	0	0	0	0	0	0	0	0	0	0	0	0	0	0	0	0	0	0	0	0	0	0	0	0	0	0	0	0	0	0	0	0	0	0	0	0	0	0	0	0
cfc605a1be0fec6ff94c797a789eea8c	0	0	0	0	0	0	0	0	0	0	0	0	0	0	0	0	0	0	0	0	0	0	0	0	0	0	0	0	0	0	0	0	0	0	0	0	0	0	0	0	0	0	0	0	0	0	0	0	0
162d380468428be715f6403345eaa137	0	0	0	0	0	0	0	0	0	0	0	0	0	0	0	0	0	0	0	0	0	0	0	0	0	0	0	0	0	0	0	0	0	0	0	0	0	0	0	0	0	0	0	0	0	0	0	0	0
2e3daa713ba0eafcae4ae5d65a774f9f	0	0	0	0	0	0	0	0	0	0	0	0	0	0	0	0	0	0	0	0	0	0	0	0	0	0	0	0	0	0	0	0	0	0	0	0	0	0	0	0	0	0	0	0	0	0	0	0	0
0f6d46c70548d4ce709802b6e3162f6f	0	0	0	0	0	0	0	0	0	0	0	0	0	0	0	0	0	0	0	0	0	0	0	0	8	0	0	0	0	0	0	0	0	0	0	13	0	0	54	0	0	0	6	0	0	0	0	0	0
bca88c697e57d95ec75e2af02ce992e2	0	0	0	0	0	0	0	0	0	0	0	0	0	0	0	0	0	0	0	0	0	0	0	0	0	0	0	0	0	0	0	0	0	0	0	0	0	0	0	0	0	0	0	0	0	0	0	0	0
09cb0bcce9ef9b5dcf6b9d7a6c663d83	0	0	0	0	0	0	0	0	0	0	0	0	0	0	0	0	0	0	0	0	0	0	0	0	0	0	0	0	0	0	0	0	0	0	0	0	0	0	0	0	0	0	0	0	0	0	0	0	0
5160e83ed49366187ffd39b06bc14897	0	0	0	0	0	0	0	0	0	0	0	0	0	0	0	0	0	0	0	0	0	0	0	0	0	0	0	0	0	0	0	0	0	0	0	0	0	0	0	0	0	0	0	0	0	0	0	0	0
05f3c856ceb915f6606f1e0aca4fa8ae	0	1	9	6	8	122	3	3	101	0	9	17	0	9	7	103	0	0	2	107	5	46	1	14	0	6	8	19	3	5	5	8	17	5	38	0	0	8	0	5	0	21	19	0	14	47	35	0	0
d641d1422558101f892611b0fe1194f0	0	0	0	0	0	6	0	2	3	0	0	3	0	0	0	4	0	0	0	0	0	3	0	0	0	0	0	3	0	0	0	0	0	0	5	0	0	0	0	0	0	0	0	0	1	0	1	0	0
a32367cd48ba6aec652c13719f6d23f2	0	2	0	2	0	18	2	0	25	0	0	0	0	0	0	8	0	0	0	12	2	2	0	0	0	1	0	5	0	0	2	2	2	0	4	0	0	0	0	0	0	3	2	0	6	3	4	0	0
3448d1bf6cccbbf7b14c71b09817cba4	0	0	4	0	2	17	0	0	10	0	4	2	0	0	0	30	0	0	0	14	0	7	0	0	0	0	0	3	0	0	0	2	5	0	5	0	2	0	0	0	0	5	0	0	4	3	0	0	0
8bb6ba264b60216d22b221d5c6c0992e	0	0	0	2	0	2	0	0	4	0	4	2	0	0	0	2	0	0	0	5	0	4	0	0	3	0	0	0	0	0	0	0	0	0	3	0	0	0	0	0	0	0	0	0	4	3	0	0	0
eb254f006a34d1ea0e5641906aa59747	0	0	0	0	0	7	0	0	0	0	0	0	0	0	0	7	0	0	0	8	0	3	0	2	0	0	0	0	0	0	0	0	0	0	2	0	0	0	0	0	0	0	0	0	0	0	0	0	0
70ed1793e682927f916f0b26a3881b14	0	0	0	0	0	0	0	0	0	0	0	0	0	0	0	0	0	0	0	0	0	0	0	0	0	0	0	0	0	0	0	0	0	0	0	0	0	0	0	0	0	0	0	0	0	0	0	0	0
0e8bc97b3b6003e64d81ee7bab83c8a5	0	0	0	0	0	0	0	0	0	0	0	2	0	0	0	0	0	0	0	0	0	0	0	0	0	0	0	0	0	0	0	0	0	0	0	0	0	0	0	0	0	0	0	0	0	0	0	0	0
d0ab2c15400fe710288526c9a33083fb	0	0	0	0	0	7	0	0	0	0	0	0	0	0	0	0	0	0	0	0	0	0	0	0	0	0	0	0	0	0	0	0	0	0	0	0	0	0	0	0	0	0	0	0	0	0	0	0	0
2de0f9fd09640e74b2b452a260409fab	0	0	0	0	0	0	0	0	3	0	0	0	0	0	0	2	0	0	0	0	0	0	0	0	0	0	0	0	0	0	0	0	0	0	0	0	0	0	0	0	0	0	0	0	0	0	0	0	0
4a91fbea81d4fc6aad46838da248268b	0	0	0	0	0	0	0	0	0	0	0	1	0	0	0	0	0	0	0	0	0	0	0	0	0	0	0	0	0	0	0	0	0	0	0	0	0	0	0	0	0	0	0	0	0	0	2	0	0
5a8c63a1400afebcd134e100c758112e	0	0	0	0	0	0	0	0	0	0	0	0	0	0	0	0	0	0	0	0	0	0	0	0	0	0	0	0	0	0	0	0	0	0	0	0	0	0	0	0	0	0	0	0	0	0	0	0	0
dde001cc50f5d8473e62de2fdb7d83c1	0	0	0	0	0	0	0	0	0	0	0	0	0	0	0	0	0	0	0	0	0	0	0	0	0	0	0	0	0	0	0	0	0	0	0	0	0	0	0	0	0	0	0	0	0	0	0	0	0
7700d116dce04ef0bbb3fc9a2deb328a	0	0	0	0	0	3	0	0	0	0	0	0	0	0	0	0	0	0	0	0	0	0	0	0	0	0	0	0	0	0	0	0	0	0	0	0	0	0	0	0	0	0	0	0	0	0	0	0	0
0072b0040e39e5d64afc5038682721dc	0	0	0	0	0	0	0	0	0	0	0	0	0	0	0	0	0	0	0	0	0	0	0	0	0	0	0	0	0	0	0	0	0	0	0	0	0	0	0	0	0	0	0	0	0	0	0	0	0
4ba5a86e53a755c6e3eb2f70a300339f	0	0	0	0	0	0	0	0	0	0	0	0	0	0	0	0	0	0	0	0	0	0	0	0	0	0	0	0	0	0	0	0	0	0	0	0	0	0	0	0	0	0	0	0	0	0	0	0	0
12f940f9951b6fb0cbbb6b40d6b71776	0	0	0	0	0	0	0	0	0	0	0	0	0	0	0	0	0	0	0	0	0	0	0	0	0	0	0	0	0	0	0	0	0	0	0	0	0	0	0	0	0	0	0	0	0	0	0	0	0
6bd95460524b199c4a65914e8749de8c	0	0	0	0	0	0	0	0	0	0	0	0	0	0	0	0	0	0	0	0	0	0	0	0	0	0	0	0	0	0	0	0	0	0	0	0	0	0	0	0	0	0	0	0	0	0	0	0	0
bd0d1ce776efcbb887d89a9c31dd8707	0	0	0	0	0	0	0	0	0	0	0	0	0	0	0	0	0	0	0	0	0	0	0	0	0	0	0	0	0	0	0	0	0	0	0	0	0	0	0	0	0	0	0	0	0	0	0	0	0
692ef3111a5143c64d5ec9d26603cc5a	0	0	0	0	0	0	0	0	0	0	0	0	0	0	0	0	0	0	0	0	0	0	0	0	0	0	0	0	0	0	0	0	0	0	0	0	0	0	0	0	0	0	0	0	0	0	0	0	0
4b58a918963708863f456bd44ae56b5b	0	0	0	0	0	0	0	0	0	0	0	0	0	0	0	0	0	0	0	0	0	0	0	0	0	0	0	0	0	0	0	0	0	0	0	0	0	0	0	0	0	0	0	0	0	0	0	0	0
2397358d6f6eaff8d40ccb98f4fbebd9	0	0	0	0	0	0	0	0	0	0	0	0	0	0	0	0	0	0	0	0	0	0	0	0	0	0	0	0	0	0	0	0	0	0	0	0	0	0	0	0	0	0	0	0	0	0	0	0	0
33db7b189dcfe16b551c393c56f3b5d5	0	0	0	0	0	0	0	0	0	0	0	0	0	0	0	0	0	0	0	0	0	0	0	0	0	0	0	0	0	0	0	0	0	0	0	0	0	0	0	0	0	0	0	0	0	0	0	0	0
9f22da56e873ade2c09013cae621e715	0	0	0	0	0	0	0	0	0	0	0	0	0	0	0	0	0	0	0	0	0	0	0	0	0	0	0	0	0	0	0	0	0	0	0	0	0	0	0	0	0	0	0	0	0	0	0	0	0
e748d50e065533ffb80c44c7ce9b78d4	0	0	0	0	0	0	0	0	2	0	0	0	0	0	0	0	0	0	0	0	0	0	0	0	0	0	0	0	0	0	0	0	0	0	0	0	0	0	0	0	0	0	0	0	0	0	0	0	0
0256efed814c10383ad0908793c5e2ff	0	0	0	0	0	0	0	0	0	0	0	0	0	0	0	0	0	0	0	0	0	0	0	0	0	0	0	0	0	0	0	0	0	0	0	0	0	0	0	0	0	0	0	0	0	0	0	0	0
3c2934680d564f24be3099a620adb243	0	0	0	0	0	0	0	0	0	0	0	0	0	0	0	0	0	0	0	0	0	0	0	0	0	0	0	0	0	0	0	0	0	0	0	0	0	0	0	0	0	0	0	0	0	0	0	0	0
e3c224e148980246988888a3bddbbb22	0	0	0	0	0	0	0	0	0	0	0	0	0	0	0	2	0	0	0	0	0	0	0	0	0	0	0	0	0	0	0	0	0	0	0	0	0	0	0	0	0	0	0	0	0	0	0	0	0
d777bbaa70de5ae5aed5d5f715ce0201	0	0	0	0	0	2	0	0	0	0	0	0	0	0	0	0	0	0	0	0	0	0	0	0	0	0	0	0	0	0	0	0	0	0	0	0	0	0	0	0	0	0	0	0	0	0	0	0	0
34588d48b1f866ee34ee3225e78009e8	0	0	0	0	0	0	0	0	0	0	0	0	0	0	0	0	0	0	0	0	0	1	0	0	0	0	0	0	0	0	0	0	0	0	0	0	0	0	0	0	0	0	0	0	1	0	1	0	0
a1c6504e8981cc8645a7f588e5f8408c	0	0	0	0	0	0	0	0	0	0	0	0	0	0	0	0	0	0	0	0	0	0	0	0	0	0	0	0	0	0	0	0	0	0	0	0	0	0	0	0	0	0	0	0	0	0	0	0	0
e9a43d976dfa1e002c02d5970c8b4255	0	0	0	0	0	0	0	0	0	0	0	0	0	0	0	0	0	0	0	0	0	0	0	0	0	0	0	0	0	0	0	0	0	0	0	0	0	0	0	0	0	0	0	0	0	0	0	0	0
a769fd25cb4cb3e65fb0b5f752ddf4cb	0	0	0	0	0	0	0	0	0	0	0	0	0	0	0	0	0	0	0	0	0	0	0	0	0	0	0	0	0	0	0	0	0	0	0	0	0	0	0	0	0	0	0	0	0	0	0	0	0
932d70b76d839b7553bb90df617aea66	0	0	0	0	0	2	0	0	0	0	0	0	0	0	0	4	0	0	0	2	0	2	0	0	0	0	0	0	0	0	0	0	0	0	0	0	0	0	0	0	0	0	0	0	0	0	0	0	0
454946e0565af9ca0cec72a700184f63	0	0	0	0	0	0	0	0	0	0	0	0	0	0	0	0	0	0	0	0	0	0	0	0	0	0	0	0	0	0	0	0	0	0	0	0	0	0	0	0	0	0	0	0	0	0	0	0	0
d06dc00291933c496e93692f04461a33	0	0	0	0	0	0	0	0	0	0	0	0	0	0	0	0	0	0	0	0	0	0	0	0	0	0	0	0	0	0	0	0	0	0	0	0	0	0	0	0	0	0	0	0	0	0	0	0	0
1f6b9f0a208495aae4792e174153c508	0	0	0	0	0	0	0	0	0	0	0	0	0	0	0	0	0	0	0	0	0	0	0	0	0	0	0	0	0	0	0	0	0	0	0	0	0	0	0	0	0	0	0	0	0	0	0	0	0
ce732db6fdb0acd1dcfb1bc18665c8ce	0	0	0	0	0	0	0	0	0	0	0	0	0	0	0	0	0	0	0	0	0	0	0	0	0	0	0	0	0	0	0	0	0	0	0	0	0	0	0	0	0	0	0	0	0	0	0	0	0
e39d99da02868537980a95b2b42f5525	0	0	0	0	0	0	0	0	0	0	0	0	0	0	0	0	0	0	0	0	0	0	0	0	0	0	0	0	0	0	0	0	0	0	0	0	0	0	0	0	0	0	0	0	0	0	0	0	0
e6d5a138e135922560122d359a014d1a	0	0	0	0	0	0	0	0	1	0	0	0	0	0	0	0	0	0	0	0	0	0	0	0	0	0	0	0	0	0	0	0	0	0	0	0	0	0	0	0	0	0	0	0	0	0	0	0	0
[truncated: 68 more columns]

## Sheet: Sheet2
Table S3: Abundance matrix of ASVs found in the negative PCR controls and mock communtiies
	PCR controls		Mock communities		Total sequence counts
ASV	NTC1	NTC2	276D	277D	Fecal_samples	PCR_controls	Mock	Taxonomy
a41b72842290a9e865efc83d63ad2818	0	0	5416	16036	0	0	21452	p__Firmicutes; c__Bacilli; o__Lactobacillales; f__Streptococcaceae; g__Streptococcus; s__
591ed1d6afd1e79ae33d6b6cd0c6b185	144	80	5080	15717	6417	224	20797	p__Proteobacteria; c__Gammaproteobacteria; o__Enterobacteriales; f__Enterobacteriaceae
be9e7e2786b3ae134712e7b6bedc2259	0	0	3813	14677	7	0	18490	p__Firmicutes; c__Bacilli; o__Bacillales; f__Staphylococcaceae; g__Staphylococcus
67dfacf96a38558ee3a659a1aa141fd5	0	0	12385	925	0	0	13310	p__Proteobacteria; c__Epsilonproteobacteria; o__Campylobacterales; f__Helicobacteraceae; g__Helicobacter; s__pylori
dee86d463f6a6a4bad3f90c961d4150b	0	0	2966	8911	0	0	11877	p__Proteobacteria; c__Alphaproteobacteria; o__Rhodobacterales; f__Rhodobacteraceae; g__Rhodobacter; s__sphaeroides
29fde6ffd0a41547e218d84de8f4fa03	0	0	10289	134	0	0	10423	p__Bacteroidetes; c__Bacteroidia; o__Bacteroidales; f__Bacteroidaceae; g__Bacteroides; s__
a3a045b51f6ba1e973a9750f7061edbb	0	0	6578	2744	0	0	9322	p__Firmicutes; c__Clostridia; o__Clostridiales; f__Clostridiaceae; g__Clostridium; s__butyricum
3876207928742711d18645217094065b	0	0	8175	582	0	0	8757	p__Proteobacteria; c__Gammaproteobacteria; o__Pseudomonadales; f__Moraxellaceae; g__Acinetobacter
63dcf1c7a95370bfe7e6b7e39eb9343b	0	0	7265	492	0	0	7757	p__Proteobacteria; c__Betaproteobacteria; o__Neisseriales; f__Neisseriaceae; g__Neisseria; s__cinerea
c804f27343fbd3504b0ef0766a3942fe	0	0	4857	2121	17	0	6978	p__Proteobacteria; c__Gammaproteobacteria; o__Pseudomonadales; f__Pseudomonadaceae
bfd4d446a5b960b55647a573d459ff58	0	0	4770	1974	0	0	6744	p__Firmicutes; c__Bacilli; o__Lactobacillales; f__Streptococcaceae; g__Streptococcus; s__agalactiae
e5084546676d262b0af7425e5b7a3a7e	0	0	4291	1764	56	0	6055	p__Firmicutes; c__Bacilli; o__Bacillales; f__Bacillaceae; g__Bacillus
e3e618b6c0b173feb5ba627d9a96d485	0	0	5652	255	825	0	5907	p__Firmicutes; c__Bacilli; o__Lactobacillales; f__Lactobacillaceae; g__Lactobacillus; s__
475aed25e995894a8ce8204c1c6b63d3	0	0	5702	35	0	0	5737	p__[Thermi]; c__Deinococci; o__Deinococcales; f__Deinococcaceae; g__Deinococcus; s__
b05f5459e068b529b2c41e659efdef34	0	0	4509	218	14	0	4727	p__Actinobacteria; c__Actinobacteria; o__Actinomycetales; f__Propionibacteriaceae; g__Propionibacterium; s__acnes
cfc605a1be0fec6ff94c797a789eea8c	0	0	4384	176	0	0	4560	p__Firmicutes; c__Bacilli; o__Bacillales; f__Listeriaceae; g__Listeria
162d380468428be715f6403345eaa137	0	0	3645	0	0	0	3645	p__Firmicutes; c__Bacilli; o__Bacillales; f__Staphylococcaceae; g__Staphylococcus
2e3daa713ba0eafcae4ae5d65a774f9f	0	0	2562	20	0	0	2582	p__Proteobacteria; c__Gammaproteobacteria; o__Pseudomonadales; f__Pseudomonadaceae; g__Pseudomonas; s__
0f6d46c70548d4ce709802b6e3162f6f	0	0	2292	12	81	0	2304	p__Actinobacteria; c__Actinobacteria; o__Actinomycetales; f__Actinomycetaceae; g__Actinomyces; s__
bca88c697e57d95ec75e2af02ce992e2	0	0	1180	2	0	0	1182	p__Firmicutes; c__Bacilli; o__Lactobacillales; f__Enterococcaceae; g__Enterococcus; s__
09cb0bcce9ef9b5dcf6b9d7a6c663d83	0	0	785	11	0	0	796	p__Firmicutes; c__Bacilli; o__Lactobacillales; f__Streptococcaceae; g__Streptococcus
5160e83ed49366187ffd39b06bc14897	0	0	521	0	0	0	521	p__Bacteroidetes; c__Bacteroidia; o__Bacteroidales; f__Bacteroidaceae; g__Bacteroides; s__
05f3c856ceb915f6606f1e0aca4fa8ae	1485	1768	2	2	2507	3253	4	p__Proteobacteria; c__Gammaproteobacteria; o__Enterobacteriales; f__Enterobacteriaceae; g__Gluconacetobacter; s__
d641d1422558101f892611b0fe1194f0	70	188	2	0	84	258	2	p__Bacteroidetes; c__Bacteroidia; o__Bacteroidales; f__Bacteroidaceae; g__Bacteroides; s__
a32367cd48ba6aec652c13719f6d23f2	227	326	0	0	388	553	0	p__Proteobacteria; c__Gammaproteobacteria; o__Pseudomonadales; f__Pseudomonadaceae; g__Pseudomonas; s__veronii
3448d1bf6cccbbf7b14c71b09817cba4	245	123	0	0	310	368	0	p__Proteobacteria; c__Gammaproteobacteria; o__Enterobacteriales; f__Enterobacteriaceae; g__Gluconacetobacter; s__
8bb6ba264b60216d22b221d5c6c0992e	37	177	0	0	109	214	0	p__Proteobacteria; c__Gammaproteobacteria; o__Pseudomonadales; f__Pseudomonadaceae; g__Pseudomonas
eb254f006a34d1ea0e5641906aa59747	54	120	0	0	81	174	0	p__Firmicutes; c__Bacilli; o__Lactobacillales; f__Carnobacteriaceae; g__Carnobacterium; s__
70ed1793e682927f916f0b26a3881b14	0	93	0	0	0	93	0	p__Bacteroidetes; c__Flavobacteriia; o__Flavobacteriales; f__Flavobacteriaceae; g__Capnocytophaga; s__
0e8bc97b3b6003e64d81ee7bab83c8a5	0	80	0	0	10	80	0	p__Verrucomicrobia; c__Verrucomicrobiae; o__Verrucomicrobiales; f__Verrucomicrobiaceae; g__Akkermansia; s__muciniphila
d0ab2c15400fe710288526c9a33083fb	0	72	0	0	17	72	0	p__Firmicutes; c__Bacilli; o__Lactobacillales; f__Streptococcaceae; g__Streptococcus; s__infantis
2de0f9fd09640e74b2b452a260409fab	47	10	0	0	23	57	0	p__Firmicutes; c__Bacilli; o__Bacillales; f__Bacillaceae
4a91fbea81d4fc6aad46838da248268b	0	57	0	0	12	57	0	p__Proteobacteria; c__Gammaproteobacteria; o__Pseudomonadales; f__Pseudomonadaceae; g__Pseudomonas; s__veronii
5a8c63a1400afebcd134e100c758112e	48	0	0	0	0	48	0	p__Bacteroidetes; c__Bacteroidia; o__Bacteroidales; f__Bacteroidaceae; g__Bacteroides; s__eggerthii
dde001cc50f5d8473e62de2fdb7d83c1	43	0	0	0	13	43	0	p__Proteobacteria; c__Betaproteobacteria; o__Burkholderiales; f__Comamonadaceae; g__Curvibacter; s__
7700d116dce04ef0bbb3fc9a2deb328a	41	0	0	0	3	41	0	p__Firmicutes; c__Clostridia; o__Clostridiales; f__Lachnospiraceae; g__Shuttleworthia; s__
0072b0040e39e5d64afc5038682721dc	40	0	0	0	0	40	0	p__Firmicutes; c__Clostridia; o__Clostridiales; f__Ruminococcaceae; g__Oscillospira; s__
4ba5a86e53a755c6e3eb2f70a300339f	0	38	0	0	0	38	0	p__Firmicutes; c__Clostridia; o__Clostridiales; f__Ruminococcaceae
12f940f9951b6fb0cbbb6b40d6b71776	0	37	0	0	0	37	0	p__Proteobacteria; c__Alphaproteobacteria; o__Rhizobiales; f__Bradyrhizobiaceae
6bd95460524b199c4a65914e8749de8c	37	0	0	0	0	37	0	p__Firmicutes; c__Clostridia; o__Clostridiales; f__Veillonellaceae; g__Phascolarctobacterium; s__
bd0d1ce776efcbb887d89a9c31dd8707	36	0	0	0	0	36	0	p__Bacteroidetes; c__Bacteroidia; o__Bacteroidales; f__S24-7; g__; s__
692ef3111a5143c64d5ec9d26603cc5a	35	0	0	0	9	35	0	p__Proteobacteria; c__Betaproteobacteria; o__Burkholderiales; f__Burkholderiaceae; g__Burkholderia; s__
4b58a918963708863f456bd44ae56b5b	34	0	0	0	0	34	0	p__Firmicutes; c__Clostridia; o__Clostridiales; f__Lachnospiraceae; g__Blautia; s__
2397358d6f6eaff8d40ccb98f4fbebd9	0	30	0	0	0	30	0	p__Proteobacteria; c__Alphaproteobacteria; o__Rhizobiales; f__Brucellaceae; g__Pseudochrobactrum; s__
33db7b189dcfe16b551c393c56f3b5d5	30	0	0	0	0	30	0	p__Firmicutes; c__Clostridia; o__Clostridiales; f__Lachnospiraceae; g__Coprococcus; s__
9f22da56e873ade2c09013cae621e715	0	30	0	0	0	30	0	p__Proteobacteria; c__Betaproteobacteria; o__Burkholderiales; f__Oxalobacteraceae; g__Ralstonia; s__
e748d50e065533ffb80c44c7ce9b78d4	29	0	0	0	2	29	0	p__Proteobacteria; c__Gammaproteobacteria; o__Enterobacteriales; f__Enterobacteriaceae; g__Proteus; s__
0256efed814c10383ad0908793c5e2ff	28	0	0	0	0	28	0	p__Bacteroidetes; c__Bacteroidia; o__Bacteroidales; f__Bacteroidaceae; g__Bacteroides; s__caccae
3c2934680d564f24be3099a620adb243	0	28	0	0	0	28	0	p__Actinobacteria; c__Actinobacteria; o__Actinomycetales; f__Micrococcaceae; g__Rothia; s__mucilaginosa
e3c224e148980246988888a3bddbbb22	27	0	0	0	4	27	0	p__Fusobacteria; c__Fusobacteriia; o__Fusobacteriales; f__Leptotrichiaceae; g__; s__
d777bbaa70de5ae5aed5d5f715ce0201	0	26	0	0	16	26	0	p__Actinobacteria; c__Actinobacteria; o__Bifidobacteriales; f__Bifidobacteriaceae; g__Bifidobacterium; s__thermacidophilum
34588d48b1f866ee34ee3225e78009e8	26	0	0	0	14	26	0	p__Proteobacteria; c__Gammaproteobacteria; o__Enterobacteriales; f__Enterobacteriaceae; g__Gluconacetobacter; s__
a1c6504e8981cc8645a7f588e5f8408c	0	25	0	0	0	25	0	p__Firmicutes; c__Bacilli; o__Gemellales; f__Gemellaceae; g__; s__
e9a43d976dfa1e002c02d5970c8b4255	0	25	0	0	0	25	0	p__Proteobacteria; c__Betaproteobacteria; o__Burkholderiales; f__Alcaligenaceae; g__Denitrobacter; s__
a769fd25cb4cb3e65fb0b5f752ddf4cb	24	0	0	0	6	24	0	p__Proteobacteria; c__Betaproteobacteria; o__Burkholderiales; f__Comamonadaceae; g__Pelomonas; s__
932d70b76d839b7553bb90df617aea66	0	21	0	0	15	21	0	p__Proteobacteria; c__Gammaproteobacteria; o__Xanthomonadales; f__Xanthomonadaceae; g__Stenotrophomonas; s__geniculata
454946e0565af9ca0cec72a700184f63	20	0	0	0	0	20	0	p__Proteobacteria; c__Alphaproteobacteria; o__Rhizobiales; f__Methylobacteriaceae; g__Methylobacterium; s__
d06dc00291933c496e93692f04461a33	0	18	0	0	0	18	0	p__Firmicutes; c__Clostridia; o__Clostridiales; f__Lachnospiraceae; g__Butyrivibrio; s__
1f6b9f0a208495aae4792e174153c508	17	0	0	0	0	17	0	p__Firmicutes; c__Clostridia; o__Clostridiales; f__Lachnospiraceae
ce732db6fdb0acd1dcfb1bc18665c8ce	17	0	0	0	0	17	0	p__Proteobacteria; c__Alphaproteobacteria; o__Sphingomonadales; f__Sphingomonadaceae; g__Sphingobium; s__
e39d99da02868537980a95b2b42f5525	14	0	0	0	0	14	0	p__Verrucomicrobia; c__Verrucomicrobiae; o__Verrucomicrobiales; f__Verrucomicrobiaceae; g__Akkermansia; s__muciniphila
e6d5a138e135922560122d359a014d1a	0	10	0	0	3	10	0	p__Proteobacteria; c__Gammaproteobacteria; o__Enterobacteriales; f__Enterobacteriaceae
