# Supplementary material for: Insular holobionts: persistence and seasonal plasticity of the Balearic wall lizard (Podarcis lilfordi) gut microbiota
Source: PeerJ. 2023 Jan 3;11:e14511. doi: 10.7717/peerj.14511 (PMC9817956; doi:10.7717/peerj.14511)
Supplement: Supplemental Information 4 [file peerj-11-14511-s004.xlsx]

## Sheet: Sheet1
Table S4: List of ASVs that signifcantly discriminated among islets based on both seasonal datsets and according to both indval and LEfSe analyses
		LEFSE									INDVAL
		AUTUMN					SPRING				AUTUMN										SPRING
			Enrichment								indval				Relfreq			Relabund			indval				Relfreq			Relabund			Taxonomy
Figure_5_ID	ASV	log_high_class	Class	LDA	p.value	log_high_class	Class	LDA	p.value		EC	NM	NG	pval	EC	NM	NG	EC	NM	NG	EC	NM	NG	pval.1	EC	NM	NG	EC	NM	NG	Phylum	Class	Order	Family	Genus	Species
ASV1	3bb7551ec97a9bacd2eb126b8521666a	4.6358	NM	4.3104	0.00411567	4.66776	NM	4.29502	0.00153701		0.018	0.518	0.2	0.009	0.25	0.897	0.571	0.072	0.578	0.349	0.008	0.759	0.053	0.001	0.25	0.938	0.333	0.032	0.81	0.158	Bacteroidetes	Bacteroidia	Bacteroidales	Bacteroidaceae	Bacteroides
ASV2	7ae97f9f54cf6fc0d22f6b73b5346c76	4.07018	NM	3.609	0.000479431	4.19913	NM	3.82259	0.00136189		0.207	0.511	0.228	0.004	0.875	1	0.905	0.237	0.511	0.252	0.064	0.576	0.304	0.003	0.625	1	0.944	0.103	0.576	0.321	Bacteroidetes	Bacteroidia	Bacteroidales	Porphyromonadaceae	Parabacteroides	P. gordonii
ASV3	b5c97bb118b54e8fc1afbba09dcb8d82	3.72768	NM	3.42081	0.000540445	4.04898	NM	3.75787	1.86e-05		0	0.531	0.071	0.01	0	0.759	0.238	0	0.7	0.3	0	0.676	0.176	0.002	0	0.875	0.778	0	0.773	0.227	Bacteroidetes	Bacteroidia	Bacteroidales	[Odoribacteraceae]	Odoribacter
ASV4	59b5717fe298ca1e4e8c5f643993a1d2	4.3277	EC	4.01588	4.07e-09	4.43969	EC	4.13202	1.56e-06		0.972	0.001	0.001	0.001	1	0.069	0.095	0.972	0.015	0.014	0.818	0.006	0.003	0.001	0.875	0.125	0.167	0.935	0.044	0.021	Bacteroidetes	Bacteroidia	Bacteroidales	Bacteroidaceae	Bacteroides
ASV5	d2103ec4413ebc45d4baced9b537d0a1	4.37381	EC	4.05918	1.28e-12	3.83199	EC	3.50381	4.34e-09		1	0	0	0.001	1	0	0	1	0	0	0.853	0.002	0	0.001	0.875	0.063	0	0.974	0.026	0	Bacteroidetes	Bacteroidia	Bacteroidales	Porphyromonadaceae	Parabacteroides	P. gordonii
ASV6	fe40f1a7a6ddfe082963689f85ae01cf	3.67406	EC	3.36726	2.98e-05	4.01729	EC	3.68228	0.000208739		0.647	0.144	0	0.002	0.875	0.552	0	0.74	0.26	0	0.633	0.079	0.005	0.002	0.75	0.625	0.167	0.844	0.127	0.029	Bacteroidetes	Bacteroidia	Bacteroidales	Bacteroidaceae	Bacteroides
ASV7	7575c5d1e36ca75c5a8171a29077f1d8	3.44068	EC	3.1292	3.53e-06	4.03403	EC	3.71955	0.0015289		0.604	0.02	0	0.001	0.75	0.103	0	0.805	0.195	0	0.585	0.012	0	0.002	0.625	0.188	0	0.936	0.064	0	Bacteroidetes	Bacteroidia	Bacteroidales	Bacteroidaceae	Bacteroides	B. ovatus
ASV8	657cf34751ede24a8bb901e90d390824	3.90081	EC	3.59221	1.28e-12	3.91027	EC	3.59801	3.79e-10		1	0	0	0.001	1	0	0	1	0	0	0.875	0	0	0.001	0.875	0	0	1	0	0	Bacteroidetes	Bacteroidia	Bacteroidales	Porphyromonadaceae	Parabacteroides	P. distasonis
ASV9	a18933a9733431c0323b81966e3e6c11	4.03231	EC	3.76388	2.28e-08	3.48173	EC	3.18631	1.24e-06		0.625	0	0	0.001	0.625	0	0	1	0	0	0.625	0	0	0.001	0.625	0	0	1	0	0	Verrucomicrobia	Verrucomicrobiae	Verrucomicrobiales	Verrucomicrobiaceae	Akkermansia
ASV10	c44299bf6bc56e6d11986b8a7725db91	3.56902	EC	3.29855	1.46e-08	3.82881	EC	3.51599	6.26e-09		0.838	0.001	0	0.001	0.875	0.034	0	0.957	0.043	0	0.875	0	0	0.001	0.875	0	0	1	0	0	Bacteroidetes	Bacteroidia	Bacteroidales	Rikenellaceae
ASV11	32346b07c25298dace2646644e3dfca5	3.61442	EC	3.29984	1.63e-07	3.47045	EC	3.19865	0.0011478		0.864	0.001	0	0.001	0.875	0.103	0.048	0.988	0.008	0.004	0.521	0.036	0.004	0.008	0.75	0.125	0.222	0.694	0.288	0.017	Bacteroidetes	Bacteroidia	Bacteroidales	Porphyromonadaceae	Porphyromonas
ASV12	b62fd07e2c96423bab395852c88fb147	3.74996	EC	3.41458	2.28e-08	3.32664	EC	3.04052	6.09e-06		0.75	0	0	0.001	0.75	0	0	1	0	0	0.578	0.001	0.012	0.002	0.75	0.063	0.056	0.77	0.019	0.211	Bacteroidetes	Bacteroidia	Bacteroidales	Porphyromonadaceae	Parabacteroides
ASV13	87716c92b164605186d00734bea9e430	3.44683	EC	3.19717	9.64e-07	3.45593	EC	3.17831	1.44e-05		0.724	0.001	0	0.001	0.75	0.034	0	0.966	0.034	0	0.768	0	0.013	0.001	0.875	0.063	0.111	0.877	0.004	0.119	Bacteroidetes	Bacteroidia	Bacteroidales	[Odoribacteraceae]	Odoribacter
ASV14	ae98aa63a4f9a9f9081e7e41b7db8af7	3.61773	EC	3.27867	1.83e-10	3.33529	EC	3.03654	2.86e-09		0.947	0.002	0	0.001	1	0.034	0	0.947	0.053	0	0.98	0.001	0	0.001	1	0.063	0	0.98	0.02	0	Proteobacteria	Alphaproteobacteria	Rickettsiales
