# Supplementary material for: Insular holobionts: persistence and seasonal plasticity of the Balearic wall lizard (Podarcis lilfordi) gut microbiota
Source: PeerJ. 2023 Jan 3;11:e14511. doi: 10.7717/peerj.14511 (PMC9817956; doi:10.7717/peerj.14511)
Supplement: Supplemental Information 5 [file peerj-11-14511-s005.xlsx]

## Sheet: Sheet1
Table S5: Stable isotopes estimated on 71 specimens collected during spring 2016.
Date	Islet	Specimen_ID	Delta 13C x 1000	Mass Fraction C x 100	Delta 15N x 1000	Mass Fraction N x 100	Sample Weight	ID_WEIGHT_gr	IF_ LENGTH_cm	SEX
2016-04-14	NM	1085	-23.23	49.36	6.69	14.48	0.306	10	7.2	M
2016-04-14	NM	1086	NA	NA	NA	NA	NA	9	6.8	M
2016-04-14	NM	1088	-22.61	43.71	6.83	10.44	0.173	9	6.9	F
2016-04-14	NM	1089	NA	NA	NA	NA	NA	3.9	5.1	F
2016-04-14	NM	1091	NA	NA	NA	NA	NA	10.3	7.1	M
2016-04-14	NM	1092	-22.04	49.81	8.31	13.43	0.295	NA	NA	NA
2016-04-14	NM	1093	NA	NA	NA	NA	NA	6.7	6.5	F
2016-04-14	NM	1099	-24.24	48.3	5.04	13.94	0.309	9.2	7.3	M
2016-04-14	NM	1100	-24.14	47.59	6.04	14	0.130	4.2	6.1	F
2016-04-14	NM	1101	-23.48	44.82	6.54	13.33	0.166	5.8	6.1	F
2016-04-14	NM	1102	-24.55	48.69	6.75	12.59	0.309	6.5	6.7	F
2016-04-14	NM	1103	-22.94	49.27	6.47	11.3	0.246	6.2	6.3	F
2016-04-14	NM	1104	-23.37	47.97	6.85	13.38	0.298	10	7.4	M
2016-04-14	NM	1105	NA	NA	NA	NA	NA	4.4	6	F
2016-04-14	NM	1106	-23.85	50.76	6.77	14.48	0.323	9.5	7	M
2016-04-14	NM	1107	-24.25	48.96	5.99	14.57	0.300	6	6.5	F
2016-04-14	NM	1108	-24.02	49.64	5.59	14.56	0.329	6	6.4	F
2016-04-14	NM	1109	-23.43	47.56	6.05	13.36	0.287	8.2	7.1	M
2016-04-14	NM	1116	-23.67	48.56	5.6	13.29	0.308	10	7.5	M
2016-04-14	NM	1133	-23.82	47.85	6.13	14.27	0.295	7	6.9	M
2016-04-14	EC	185	-21.73	51.58	10.6	14.97	0.299	9.5	7	M
2016-04-14	EC	187	-23.79	50.6	13.42	14.47	0.141	6.4	6.5	F
2016-04-14	EC	188	-23.96	49.83	10.55	14.26	0.244	7	6.5	F
2016-04-14	EC	190	-23.43	50.44	10.8	14.48	0.255	7	6.6	F
2016-04-14	EC	191	-24.62	53.16	11.8	12.28	0.385	7.6	7	F
2016-04-14	EC	193	-23.85	45.36	12.21	12.93	0.300	6.8	6.8	F
2016-04-14	EC	194	-21.82	56.23	10.11	11.98	0.185	8.7	6.8	F
2016-04-14	EC	195	-22.49	48.27	11.09	14.06	0.238	6.4	6.5	F
2016-04-14	EC	196	-22.89	49.05	10.51	13.8	0.350	7.2	6.8	F
2016-04-14	EC	197	-23.58	47.67	9.44	14.39	0.213	11	7.4	M
2016-04-14	EC	198	-21.77	36.18	8.75	11.05	0.141	8.4	6.7	F
2016-04-14	EC	199	-23.13	50.01	9.45	15.22	0.302	9	7.1	M
2016-04-14	EC	204	-21.26	50.56	8.74	15.33	0.303	11.8	7.3	M
2016-04-14	EC	205	-21.83	48.96	9.55	14.71	0.294	9	7	M
2016-04-15	EC	85	-22.95	49.32	9.99	14.09	0.283	10	7.2	M
2016-04-15	EC	86	-23.37	47.94	10.09	13.41	0.290	6.7	6.5	F
2016-04-15	EC	87	-23.19	51.7	9.92	14.9	0.299	10.7	7.4	M
2016-04-15	EC	91	-21.13	49.12	10.34	14.13	0.242	10.6	7.1	M
2016-04-15	EC	92	-24.34	39.53	11.2	11.6	0.354	6.7	6.5	F
2016-04-15	EC	93	-21.96	53.66	8.78	15.32	0.307	11.2	7.7	M
2016-04-15	EC	94	-23.37	47.33	10.05	12.89	0.235	9.1	6.8	M
2016-04-15	EC	96	-23.87	53.05	10.32	13.93	0.378	7	6.4	F
2016-04-15	EC	1B	-22.49	51.79	9.63	14.99	0.336	9.6	7.1	M
2016-04-15	EC	3B	-19.33	49.71	9.84	14.61	0.316	9.7	6.7	M
2016-04-15	EC	4B	-23.04	50.01	10.15	14.3	0.303	11.3	7.2	M
2016-04-15	EC	8B	-21.82	51.13	9.68	14.61	0.309	10.4	7.2	M
2016-04-15	EC	11B	-21.05	48.94	9.52	13.46	0.325	9.5	7	M
2016-04-15	EC	13B	-22.55	50.05	9.73	14.75	0.230	9.2	6.8	M
2016-04-15	EC	14B	-21.84	49.83	10.22	14.12	0.335	7.2	6.4	M
2016-04-15	EC	15B	-22.62	54.49	10.18	12.55	0.270	5	6.4	F
2016-05-18	NG	3	-24.46	50.36	5.6	15.21	0.211	6	5.9	M
2016-05-18	NG	4	-24.17	48.73	5.88	14.53	0.296	9	7	M
2016-05-18	NG	8	-24.4	50.35	5.44	15.34	0.306	8.6	7.6	M
2016-05-18	NG	9	-24.17	44.05	5.48	13.34	0.329	7.8	6.5	M
2016-05-18	NG	10	-24.91	51.77	6.17	15.13	0.249	6.2	6.3	M
2016-05-18	NG	11	-23.6	51.57	5.7	14.62	0.298	5.9	6.2	F
2016-05-19	NG	14	-24.23	50.25	5.66	14.54	0.163	8.5	6.8	M
2016-05-19	NG	15	-24.22	51.05	5.08	15.13	0.289	8	6.8	M
2016-05-19	NG	16	NA	NA	NA	NA	NA	7.3	6.8	F
2016-05-19	NG	18	-24.27	51.34	5.28	14.88	0.345	4.6	5.7	F
2016-05-19	NG	20	-24.86	50.9	5.57	14.99	0.304	8	6.8	M
2016-05-19	NG	21	-23.74	50.13	6.18	14.93	0.313	7.3	6.6	M
2016-05-19	NG	22	-23.88	50.77	7.71	14.01	0.157	3.8	5.2	F
2016-05-19	NG	24	-24.51	49.97	5.84	14.89	0.345	7.4	6.8	M
2016-05-19	NG	26	-24.66	44.65	6.16	12.8	0.352	9	6.7	M
2016-05-25	NG	28	-24.33	51.73	5.7	15.12	0.363	7	6.4	M
2016-05-25	NG	35	-24.67	50.06	5	15.11	0.355	7.6	6.6	M
2016-05-25	NG	37	-24.26	51.05	5.3	15.25	0.321	8.6	6.9	M
2016-05-25	NG	38	-24.8	49.94	5.9	14.84	0.321	9	6.8	M
2016-05-25	NG	45	NA	NA	NA	NA	NA	6.2	6	F
2016-05-25	NG	49	-24.5	51.05	5.89	15.1	0.290	8.3	6.8	M
