# Supplementary material for: Insular holobionts: persistence and seasonal plasticity of the Balearic wall lizard (Podarcis lilfordi) gut microbiota
Source: PeerJ. 2023 Jan 3;11:e14511. doi: 10.7717/peerj.14511 (PMC9817956; doi:10.7717/peerj.14511)
Supplement: Supplemental Information 6 [file peerj-11-14511-s006.xlsx]

## Sheet: Sheet1
Table S6: List of persistent ASVs found in NM and NG
Islet	ASV	Phylum	Class	Order	Family	Genus	Species
NM	ec0d6515d924c1f0d0e807d9d9038d88	Lentisphaerae	[Lentisphaeria]	Victivallales	Victivallaceae
NM	aa24cd3ae457aa00fdcbc8ea4ce98e61	Firmicutes	Clostridia	Clostridiales	Veillonellaceae
NM	e09c1336c83f322b4c87ce1dfed1ad43	Firmicutes	Clostridia	Clostridiales	Veillonellaceae
NM	dc1d000d2ad856b1efbd9af1ce0c4568	Bacteroidetes	Bacteroidia	Bacteroidales	S24-7
NM	036136e8ead714c63c347faa02ba5ff5	Firmicutes	Clostridia	Clostridiales	Ruminococcaceae	Oscillospira
NM	03e57e1f7ff88f0f5fe7426886c1e1ce	Firmicutes	Clostridia	Clostridiales	Ruminococcaceae	Oscillospira
NM	0602d20727fc87d1cd12850e5aa620b0	Firmicutes	Clostridia	Clostridiales	Ruminococcaceae
NM	06092ef5739bb73bae8e95de6f863256	Firmicutes	Clostridia	Clostridiales	Ruminococcaceae	Oscillospira
NM	07155fe648029be63758ee4f633dad1a	Firmicutes	Clostridia	Clostridiales	Ruminococcaceae	Oscillospira
NM	0878a69626dbc7078de8049603eb9bdd	Firmicutes	Clostridia	Clostridiales	Ruminococcaceae	Oscillospira
NM	18697e8240afc0017f20fde5136a1490	Firmicutes	Clostridia	Clostridiales	Ruminococcaceae	Oscillospira
NM	1f28b3e656896666ff6b493769d89aae	Firmicutes	Clostridia	Clostridiales	Ruminococcaceae
NM	25a96134e15b97c172c162e860e8a326	Firmicutes	Clostridia	Clostridiales	Ruminococcaceae
NM	3348c196d1bde3961288015f9a0deb38	Firmicutes	Clostridia	Clostridiales	Ruminococcaceae
NM	3c80993b2cbd964f651ccedf74339b54	Firmicutes	Clostridia	Clostridiales	Ruminococcaceae
NM	41de14e523aff5bd65c2983b2dff7cd7	Firmicutes	Clostridia	Clostridiales	Ruminococcaceae	Oscillospira
NM	42dd3ae75c45270b0e029f7ecb542f8a	Firmicutes	Clostridia	Clostridiales	Ruminococcaceae	Oscillospira
NM	4559248c74d5709108c66a1053efa742	Firmicutes	Clostridia	Clostridiales	Ruminococcaceae	Oscillospira
NM	46b595fb9d42b1e7a3e7f6c1fef264c8	Firmicutes	Clostridia	Clostridiales	Ruminococcaceae
NM	4894f8be0657aff9ca3292e0cfdab79a	Firmicutes	Clostridia	Clostridiales	Ruminococcaceae	Oscillospira
NM	4cadfae87ff6ef42975e04007f97c972	Firmicutes	Clostridia	Clostridiales	Ruminococcaceae	Oscillospira
NM	629600e92b9175ac52e765ca4824a8a2	Firmicutes	Clostridia	Clostridiales	Ruminococcaceae	Oscillospira
NM	7ca19bde2f95483c8a0823075bbd696b	Firmicutes	Clostridia	Clostridiales	Ruminococcaceae
NM	880de7650bc43946b1eeaa9eb84c9afa	Firmicutes	Clostridia	Clostridiales	Ruminococcaceae	Butyricicoccus	pullicaecorum
NM	8d1e0a8ca56cbe479ac252b1eaa9bce3	Firmicutes	Clostridia	Clostridiales	Ruminococcaceae	Oscillospira
NM	929697b6c6b38ec9296c15a78ef858a1	Firmicutes	Clostridia	Clostridiales	Ruminococcaceae	Oscillospira
NM	92b8372223126d525b549ed23ece2de4	Firmicutes	Clostridia	Clostridiales	Ruminococcaceae	Anaerofilum
NM	941e0dcdc8442e099bf7fef5b92c758a	Firmicutes	Clostridia	Clostridiales	Ruminococcaceae	Oscillospira
NM	9c849abf0fd1983fb81ee109c20b4f87	Firmicutes	Clostridia	Clostridiales	Ruminococcaceae	Oscillospira
NM	a3ab634bb4c3e266e9fa369353f42a7d	Firmicutes	Clostridia	Clostridiales	Ruminococcaceae	Oscillospira
NM	a4b08afb41fd7c4ccf3c3365a98058f8	Firmicutes	Clostridia	Clostridiales	Ruminococcaceae	Oscillospira
NM	ab3c094e8541a731e154432e2c0285c4	Firmicutes	Clostridia	Clostridiales	Ruminococcaceae	Oscillospira
NM	abb31b5c13e02bd8c596310ce738df08	Firmicutes	Clostridia	Clostridiales	Ruminococcaceae	Oscillospira
NM	af55d1f16ccf85befde53df479defdb2	Firmicutes	Clostridia	Clostridiales	Ruminococcaceae	Ruminococcus
NM	b351470ecce44478b75ff6ccefc322e6	Firmicutes	Clostridia	Clostridiales	Ruminococcaceae	Oscillospira
NM	bdc2a0fdde88f16f46aae28f0655b773	Firmicutes	Clostridia	Clostridiales	Ruminococcaceae
NM	c6555f27c699d01fa66b78a103559778	Firmicutes	Clostridia	Clostridiales	Ruminococcaceae
NM	d0678b26f1b1adface9d0c1099e61425	Firmicutes	Clostridia	Clostridiales	Ruminococcaceae	Oscillospira
NM	d347529956a17a92c99eb4ffa33ee441	Firmicutes	Clostridia	Clostridiales	Ruminococcaceae
NM	d3dc955ae8e79b9c9ab0273a6056a708	Firmicutes	Clostridia	Clostridiales	Ruminococcaceae	Oscillospira
NM	da9659b21943ff56d5dd9adc56cad323	Firmicutes	Clostridia	Clostridiales	Ruminococcaceae	Oscillospira
NM	e6e2607df619da709c9b9bd9204a5518	Firmicutes	Clostridia	Clostridiales	Ruminococcaceae	Oscillospira
NM	eebd291873d6fe80792d922968e729d8	Firmicutes	Clostridia	Clostridiales	Ruminococcaceae	Ruminococcus
NM	f4969132c95e0442319f1e004b9fa864	Firmicutes	Clostridia	Clostridiales	Ruminococcaceae
NM	f9834a5b3d9f3017206a779b6f26379f	Firmicutes	Clostridia	Clostridiales	Ruminococcaceae	Ruminococcus
NM	fbce01f7cc604374247d1f8675bb29f2	Firmicutes	Clostridia	Clostridiales	Ruminococcaceae	Oscillospira
NM	00eea6adb849d7d173c19090cbdbfcfc	Bacteroidetes	Bacteroidia	Bacteroidales	Rikenellaceae
NM	5c43565006d70751ace565ef8b6d819c	Bacteroidetes	Bacteroidia	Bacteroidales	Rikenellaceae	Alistipes	indistinctus
NM	63380953905c02558cff39c2d1ce9d10	Bacteroidetes	Bacteroidia	Bacteroidales	Rikenellaceae
NM	a7a05bb9360908c2fc537444128aaa9c	Bacteroidetes	Bacteroidia	Bacteroidales	Rikenellaceae
NM	b2ffca3d6d8c8ac2d2d938e1b5bb915f	Bacteroidetes	Bacteroidia	Bacteroidales	Rikenellaceae
NM	c9df468a19fb7488b4b3748062988a49	Bacteroidetes	Bacteroidia	Bacteroidales	Rikenellaceae
NM	d8accc5224fcea846f8d2647b1bd3ae9	Bacteroidetes	Bacteroidia	Bacteroidales	Rikenellaceae
NM	e4e57ce64e6fd2a7b52aae3343de982d	Bacteroidetes	Bacteroidia	Bacteroidales	Rikenellaceae	Rikenella
NM	093a12421ef526ad04a8eb5fc7787c47	Bacteroidetes	Bacteroidia	Bacteroidales	Porphyromonadaceae	Parabacteroides	gordonii
NM	1c38217653ccc0b533765fe1141cf5d2	Bacteroidetes	Bacteroidia	Bacteroidales	Porphyromonadaceae	Parabacteroides	gordonii
NM	342ac5cf320f718ca71dd4b823ffb9ed	Bacteroidetes	Bacteroidia	Bacteroidales	Porphyromonadaceae	Porphyromonas
NM	44a870333a7202203e144e681e8562e9	Bacteroidetes	Bacteroidia	Bacteroidales	Porphyromonadaceae	Parabacteroides
NM	7ae97f9f54cf6fc0d22f6b73b5346c76	Bacteroidetes	Bacteroidia	Bacteroidales	Porphyromonadaceae	Parabacteroides	gordonii
NM	cf30ae7250a326d515ee06ab165d7686	Firmicutes	Clostridia	Clostridiales	Peptococcaceae
NM	0b056b5af335ddf8c5044b8fce87045c	Firmicutes	Clostridia	Clostridiales	Lachnospiraceae
NM	18b87e70f53ce2fbcb612413fa3888a7	Firmicutes	Clostridia	Clostridiales	Lachnospiraceae
NM	1c2204512a01b3e0708db9c91dd52f8b	Firmicutes	Clostridia	Clostridiales	Lachnospiraceae
NM	1e704442d9676b27608745f8c00c7860	Firmicutes	Clostridia	Clostridiales	Lachnospiraceae
NM	22e5d015e610da7277714a3ebf5000b4	Firmicutes	Clostridia	Clostridiales	Lachnospiraceae
NM	28fb140d46cf167a3f1976eb4d8855a0	Firmicutes	Clostridia	Clostridiales	Lachnospiraceae
NM	2c9fb000c1c5ce35f2adc2c280e21a4e	Firmicutes	Clostridia	Clostridiales	Lachnospiraceae	Clostridium
NM	369e064350f5b719ba67b7db0a257b5b	Firmicutes	Clostridia	Clostridiales	Lachnospiraceae
NM	4b8f9c4141c2ec34339680e981e409cd	Firmicutes	Clostridia	Clostridiales	Lachnospiraceae
NM	64ca65803b97525889e7607c1aeaef64	Firmicutes	Clostridia	Clostridiales	Lachnospiraceae
NM	665cf77fe4e20f3d809b716009c45013	Firmicutes	Clostridia	Clostridiales	Lachnospiraceae	Roseburia
NM	701a62ed34ac3d0bb343337fffdecea3	Firmicutes	Clostridia	Clostridiales	Lachnospiraceae
NM	8771b6279e16fc8aa2e2ba2646b03e33	Firmicutes	Clostridia	Clostridiales	Lachnospiraceae
NM	9496fec2565cbef69e99e590ab010689	Firmicutes	Clostridia	Clostridiales	Lachnospiraceae
NM	995523e90f6cb421b7ac979223605799	Firmicutes	Clostridia	Clostridiales	Lachnospiraceae
NM	9f6619e957bc0557f07c6580ee325b9f	Firmicutes	Clostridia	Clostridiales	Lachnospiraceae
NM	a7170ea6f21f65769bbcb0131625f4f3	Firmicutes	Clostridia	Clostridiales	Lachnospiraceae	Blautia	producta
NM	abab79e1fe980733546408cbf9fdbc0b	Firmicutes	Clostridia	Clostridiales	Lachnospiraceae	Dorea
NM	b3109319445008804b634d387d46f198	Firmicutes	Clostridia	Clostridiales	Lachnospiraceae
NM	b8974b0cd72b2a5079fa3d58eec0cce5	Firmicutes	Clostridia	Clostridiales	Lachnospiraceae	Coprococcus
NM	bd7fa538242e2349b0d400dc3f2ef77e	Firmicutes	Clostridia	Clostridiales	Lachnospiraceae	[Ruminococcus]	gnavus
NM	d0d00eeb4f8ca57fdd13cd1a744fcbde	Firmicutes	Clostridia	Clostridiales	Lachnospiraceae
NM	dbfcf5d7bf1ec461d40c0befebf1835d	Firmicutes	Clostridia	Clostridiales	Lachnospiraceae	Coprococcus
NM	deb69b52e59acc99e6941d9c97f469f0	Firmicutes	Clostridia	Clostridiales	Lachnospiraceae
NM	e368d24679804a8bea2bab39c2b3a555	Firmicutes	Clostridia	Clostridiales	Lachnospiraceae	Dorea
NM	eb0ce025f750ad5e9839dc3c10602d78	Firmicutes	Clostridia	Clostridiales	Lachnospiraceae
NM	fbc50a8a333a1c1cb09f369f7f0f7bbe	Firmicutes	Clostridia	Clostridiales	Lachnospiraceae	Dorea
NM	ff067bb1428ba11a1250d867cb744298	Firmicutes	Clostridia	Clostridiales	Lachnospiraceae
NM	aa98dc927a4f154d35a001085ca9bcce	Proteobacteria	Epsilonproteobacteria	Campylobacterales	Helicobacteraceae	Flexispira
NM	6e81c93a891bd6660cee4be66e70aef4	Firmicutes	Clostridia	Clostridiales	Eubacteriaceae	Pseudoramibacter_Eubacterium
NM	5ca969e4e49c2150a3ab00f75e94daa0	Firmicutes	Erysipelotrichi	Erysipelotrichales	Erysipelotrichaceae
NM	7ef65e7a88f775b4ad3e4ebcb448e331	Firmicutes	Erysipelotrichi	Erysipelotrichales	Erysipelotrichaceae	Coprobacillus
NM	85ea3ab37ef0ba4230d5e18ff5eebcb4	Firmicutes	Erysipelotrichi	Erysipelotrichales	Erysipelotrichaceae	Anaerorhabdus	furcosa
NM	8ba1003dee1708fc6fd6246977a42bc4	Firmicutes	Erysipelotrichi	Erysipelotrichales	Erysipelotrichaceae
NM	c8db65cd923eb078d3082e7f6ffe7ddc	Firmicutes	Erysipelotrichi	Erysipelotrichales	Erysipelotrichaceae
NM	dc7dc6d036a3e4c7da76d9e33bbf8c78	Firmicutes	Erysipelotrichi	Erysipelotrichales	Erysipelotrichaceae
NM	e03f9292fb2b629dac6e6bd40704b2de	Firmicutes	Erysipelotrichi	Erysipelotrichales	Erysipelotrichaceae	Clostridium	ramosum
NM	ecb83c1fd0d885366790df39ff61e472	Firmicutes	Erysipelotrichi	Erysipelotrichales	Erysipelotrichaceae
NM	f11e992935bfb9edcd1c151eec52970a	Firmicutes	Erysipelotrichi	Erysipelotrichales	Erysipelotrichaceae
NM	f5ccb8e6959c242ae9753b5d77edfec4	Firmicutes	Erysipelotrichi	Erysipelotrichales	Erysipelotrichaceae
NM	28c9e399296808ddd37ea2feaf092d12	Proteobacteria	Deltaproteobacteria	Desulfovibrionales	Desulfovibrionaceae	Bilophila
NM	7c2d30a0057a38e19e314bf6c729514b	Proteobacteria	Deltaproteobacteria	Desulfovibrionales	Desulfovibrionaceae
NM	9ddbb9f3235a4d49679636c03acd5186	Proteobacteria	Deltaproteobacteria	Desulfovibrionales	Desulfovibrionaceae	Desulfovibrio
NM	fbdf2b1282fe99b4c707f69887a30aa6	Firmicutes	Clostridia	Clostridiales	Dehalobacteriaceae	Dehalobacterium
NM	1c95c7c381d22117c65fa3d804000ce4	Actinobacteria	Coriobacteriia	Coriobacteriales	Coriobacteriaceae	Paraeggerthella	hongkongensis
NM	957bc4f51f13dcf1c85785d3d60e4777	Actinobacteria	Coriobacteriia	Coriobacteriales	Coriobacteriaceae
NM	d186abf5e3f0d65a7dc7a866a6458b3d	Actinobacteria	Coriobacteriia	Coriobacteriales	Coriobacteriaceae	Adlercreutzia
NM	eb26eefda4af0aeca7432a7561cc8d36	Actinobacteria	Coriobacteriia	Coriobacteriales	Coriobacteriaceae
NM	ebc6118f1e70c631be2fb9094dbf00dc	Actinobacteria	Coriobacteriia	Coriobacteriales	Coriobacteriaceae	Enterococcus	casseliflavus
NM	16581f1341159085917e0b0c14834b12	Firmicutes	Clostridia	Clostridiales	Christensenellaceae
NM	03d8e905c3acd9038bbea399fc9afea4	Bacteroidetes	Bacteroidia	Bacteroidales	Bacteroidaceae	Bacteroides
NM	072cd9606ef2440fbb7dd3f585d38dbc	Bacteroidetes	Bacteroidia	Bacteroidales	Bacteroidaceae	Bacteroides
NM	0c66d5e224490b5fe7b5f9ee9ab6166e	Bacteroidetes	Bacteroidia	Bacteroidales	Bacteroidaceae	Bacteroides
NM	1210c67494f234869c42b7c98d2ec758	Bacteroidetes	Bacteroidia	Bacteroidales	Bacteroidaceae	Bacteroides
NM	28577d0c3cdd6e00da06f83a3bb164f7	Bacteroidetes	Bacteroidia	Bacteroidales	Bacteroidaceae	Bacteroides
NM	3ae938ca339d3b75e9b1180eabe6f47d	Bacteroidetes	Bacteroidia	Bacteroidales	Bacteroidaceae	Bacteroides
NM	3bb7551ec97a9bacd2eb126b8521666a	Bacteroidetes	Bacteroidia	Bacteroidales	Bacteroidaceae	Bacteroides
NM	411d5a652e0c5bed13f0e0bf184d918b	Bacteroidetes	Bacteroidia	Bacteroidales	Bacteroidaceae	Bacteroides
NM	428829cca0363b191c80f561f314f3ae	Bacteroidetes	Bacteroidia	Bacteroidales	Bacteroidaceae	Bacteroides
NM	4c31b9f379fb5ef4845299340e4ecace	Bacteroidetes	Bacteroidia	Bacteroidales	Bacteroidaceae	Bacteroides
NM	5f65c177995eee5dea4d04aef2753009	Bacteroidetes	Bacteroidia	Bacteroidales	Bacteroidaceae	Bacteroides
NM	615921a2952ff64b4b39e2630a18d479	Bacteroidetes	Bacteroidia	Bacteroidales	Bacteroidaceae	Bacteroides
NM	c5e2344e6a032cd4d7db4c73bbfafd32	Bacteroidetes	Bacteroidia	Bacteroidales	Bacteroidaceae	Bacteroides
NM	af6834e6719155b144e4649c1ae805fe	Tenericutes	Mollicutes	Anaeroplasmatales	Anaeroplasmataceae	Anaeroplasma
NM	ec3ef6d3fcb45d763873ac9417e91430	Tenericutes	Mollicutes	Anaeroplasmatales	Anaeroplasmataceae
NM	9f2c0bcef5b3acc9f882e18a5f51e305	Bacteroidetes	Bacteroidia	Bacteroidales	[Odoribacteraceae]	Odoribacter
NM	b5c97bb118b54e8fc1afbba09dcb8d82	Bacteroidetes	Bacteroidia	Bacteroidales	[Odoribacteraceae]	Odoribacter
NM	ef5a2ca667bd274b643f1e1d4458a955	Bacteroidetes	Bacteroidia	Bacteroidales	[Odoribacteraceae]	Odoribacter
NM	14fbfa9a624e36f83d008152b8ad120e	Firmicutes	Clostridia	Clostridiales	[Mogibacteriaceae]	Anaerovorax
NM	4b12e7a3b19303f42b4db94503cba1bd	Firmicutes	Clostridia	Clostridiales	[Mogibacteriaceae]
NM	5b776dbaa20108557e01c959eb7c1bd1	Firmicutes	Clostridia	Clostridiales	[Mogibacteriaceae]
NM	7b23d4c9eda60f616d6b4adc7b21dcbf	Firmicutes	Clostridia	Clostridiales	[Mogibacteriaceae]
NM	8dbc4df00378a18b2c8d1d7debdd6300	Firmicutes	Clostridia	Clostridiales	[Mogibacteriaceae]
NM	67a55f8f72d812e5dcf6e03a405efb56	Tenericutes	Mollicutes	RF39
NM	262bcf8e78a28ce7adf83ffe3cf66588	Proteobacteria	Alphaproteobacteria	RF32
NM	e68f6ba852e82281e53b2bb128f04731	Proteobacteria	Alphaproteobacteria	Rickettsiales
NM	263b81aff509464acfad59da91fa90f8	Firmicutes	Clostridia	Clostridiales
NM	2aaae3842fd8be509b775740a4ec787e	Firmicutes	Clostridia	Clostridiales
NM	2c4aee95cb2e0deb355f1e0afb3c7626	Firmicutes	Clostridia	Clostridiales
NM	4989fa9089225629c4007e53d3a3714f	Firmicutes	Clostridia	Clostridiales
NM	6bb53cd3333a71f68d7ecabbabd58418	Firmicutes	Clostridia	Clostridiales
NM	7ef1f0e4c8d4afe5d15893fa737a4ee1	Firmicutes	Clostridia	Clostridiales
NM	86d33f33b14662a6a4e033d0b540278a	Firmicutes	Clostridia	Clostridiales
NM	8d9db6bf4f91eb03410f4b65e5992d1a	Firmicutes	Clostridia	Clostridiales
NM	9bdbdf13a20c41052da53de3b4436ab8	Firmicutes	Clostridia	Clostridiales
NM	a4b929d25334c34eb18fca9a5669ed52	Firmicutes	Clostridia	Clostridiales
NM	afd6c9a08f045d12b64b439021f3337d	Firmicutes	Clostridia	Clostridiales
NM	d4ede4f69b87950cfc2a677dd7fc0d15	Firmicutes	Clostridia	Clostridiales
NM	dbcc1b08e37598d13406803bf6825606	Firmicutes	Clostridia	Clostridiales
NM	e7782b6827bb042621b9d8271e8a6660	Firmicutes	Clostridia	Clostridiales
NM	fefeae219591f8b87c12533e30566824	Firmicutes	Clostridia	Clostridiales
NG	081a760329ff36deeb00c40b11af8cd6	Firmicutes	Clostridia	Clostridiales	Veillonellaceae
NG	aa24cd3ae457aa00fdcbc8ea4ce98e61	Firmicutes	Clostridia	Clostridiales	Veillonellaceae
NG	e09c1336c83f322b4c87ce1dfed1ad43	Firmicutes	Clostridia	Clostridiales	Veillonellaceae
NG	036136e8ead714c63c347faa02ba5ff5	Firmicutes	Clostridia	Clostridiales	Ruminococcaceae	Oscillospira
NG	03e57e1f7ff88f0f5fe7426886c1e1ce	Firmicutes	Clostridia	Clostridiales	Ruminococcaceae	Oscillospira
NG	06092ef5739bb73bae8e95de6f863256	Firmicutes	Clostridia	Clostridiales	Ruminococcaceae	Oscillospira
NG	07155fe648029be63758ee4f633dad1a	Firmicutes	Clostridia	Clostridiales	Ruminococcaceae	Oscillospira
NG	087aae6fc14e2f9807532c46c73887ac	Firmicutes	Clostridia	Clostridiales	Ruminococcaceae	Ruminococcus
NG	21bdcdbf32275700cf3fe244e64d30c1	Firmicutes	Clostridia	Clostridiales	Ruminococcaceae
NG	41de14e523aff5bd65c2983b2dff7cd7	Firmicutes	Clostridia	Clostridiales	Ruminococcaceae	Oscillospira
NG	42dd3ae75c45270b0e029f7ecb542f8a	Firmicutes	Clostridia	Clostridiales	Ruminococcaceae	Oscillospira
NG	46b595fb9d42b1e7a3e7f6c1fef264c8	Firmicutes	Clostridia	Clostridiales	Ruminococcaceae
NG	4894f8be0657aff9ca3292e0cfdab79a	Firmicutes	Clostridia	Clostridiales	Ruminococcaceae	Oscillospira
NG	4cadfae87ff6ef42975e04007f97c972	Firmicutes	Clostridia	Clostridiales	Ruminococcaceae	Oscillospira
NG	542ed6a3edfc1a64db378f18058e24e2	Firmicutes	Clostridia	Clostridiales	Ruminococcaceae	Oscillospira
NG	629600e92b9175ac52e765ca4824a8a2	Firmicutes	Clostridia	Clostridiales	Ruminococcaceae	Oscillospira
NG	7ca19bde2f95483c8a0823075bbd696b	Firmicutes	Clostridia	Clostridiales	Ruminococcaceae
NG	8d1e0a8ca56cbe479ac252b1eaa9bce3	Firmicutes	Clostridia	Clostridiales	Ruminococcaceae	Oscillospira
NG	929697b6c6b38ec9296c15a78ef858a1	Firmicutes	Clostridia	Clostridiales	Ruminococcaceae	Oscillospira
NG	92b8372223126d525b549ed23ece2de4	Firmicutes	Clostridia	Clostridiales	Ruminococcaceae	Anaerofilum
NG	941e0dcdc8442e099bf7fef5b92c758a	Firmicutes	Clostridia	Clostridiales	Ruminococcaceae	Oscillospira
NG	a3ab634bb4c3e266e9fa369353f42a7d	Firmicutes	Clostridia	Clostridiales	Ruminococcaceae	Oscillospira
NG	a6c6f96cc321d7d5522fb2476b79a2d5	Firmicutes	Clostridia	Clostridiales	Ruminococcaceae	Oscillospira
NG	abb31b5c13e02bd8c596310ce738df08	Firmicutes	Clostridia	Clostridiales	Ruminococcaceae	Oscillospira
NG	af55d1f16ccf85befde53df479defdb2	Firmicutes	Clostridia	Clostridiales	Ruminococcaceae	Ruminococcus
NG	bdc2a0fdde88f16f46aae28f0655b773	Firmicutes	Clostridia	Clostridiales	Ruminococcaceae
NG	d0678b26f1b1adface9d0c1099e61425	Firmicutes	Clostridia	Clostridiales	Ruminococcaceae	Oscillospira
NG	d347529956a17a92c99eb4ffa33ee441	Firmicutes	Clostridia	Clostridiales	Ruminococcaceae
NG	d3dc955ae8e79b9c9ab0273a6056a708	Firmicutes	Clostridia	Clostridiales	Ruminococcaceae	Oscillospira
NG	da9659b21943ff56d5dd9adc56cad323	Firmicutes	Clostridia	Clostridiales	Ruminococcaceae	Oscillospira
NG	e6e2607df619da709c9b9bd9204a5518	Firmicutes	Clostridia	Clostridiales	Ruminococcaceae	Oscillospira
NG	f4969132c95e0442319f1e004b9fa864	Firmicutes	Clostridia	Clostridiales	Ruminococcaceae
NG	f9834a5b3d9f3017206a779b6f26379f	Firmicutes	Clostridia	Clostridiales	Ruminococcaceae	Ruminococcus
NG	b3c3b58775d030e62be1ded907bf3049	Bacteroidetes	Bacteroidia	Bacteroidales	Rikenellaceae
NG	c9df468a19fb7488b4b3748062988a49	Bacteroidetes	Bacteroidia	Bacteroidales	Rikenellaceae
NG	d4a8a2d25416eb82555ede62dfa6f801	Bacteroidetes	Bacteroidia	Bacteroidales	Rikenellaceae
NG	e4e57ce64e6fd2a7b52aae3343de982d	Bacteroidetes	Bacteroidia	Bacteroidales	Rikenellaceae	Rikenella
NG	093a12421ef526ad04a8eb5fc7787c47	Bacteroidetes	Bacteroidia	Bacteroidales	Porphyromonadaceae	Parabacteroides	gordonii
NG	1c38217653ccc0b533765fe1141cf5d2	Bacteroidetes	Bacteroidia	Bacteroidales	Porphyromonadaceae	Parabacteroides	gordonii
NG	44a870333a7202203e144e681e8562e9	Bacteroidetes	Bacteroidia	Bacteroidales	Porphyromonadaceae	Parabacteroides
NG	7ae97f9f54cf6fc0d22f6b73b5346c76	Bacteroidetes	Bacteroidia	Bacteroidales	Porphyromonadaceae	Parabacteroides	gordonii
NG	43d6557b41ba8adda3e6103fb9d0db8a	Firmicutes	Clostridia	Clostridiales	Peptococcaceae
NG	cf30ae7250a326d515ee06ab165d7686	Firmicutes	Clostridia	Clostridiales	Peptococcaceae
NG	0831db5b5309ed361907c514cbb278d9	Firmicutes	Clostridia	Clostridiales	Lachnospiraceae	Dorea
NG	0b056b5af335ddf8c5044b8fce87045c	Firmicutes	Clostridia	Clostridiales	Lachnospiraceae
NG	18b87e70f53ce2fbcb612413fa3888a7	Firmicutes	Clostridia	Clostridiales	Lachnospiraceae
NG	1e704442d9676b27608745f8c00c7860	Firmicutes	Clostridia	Clostridiales	Lachnospiraceae
NG	22e5d015e610da7277714a3ebf5000b4	Firmicutes	Clostridia	Clostridiales	Lachnospiraceae
NG	2c9fb000c1c5ce35f2adc2c280e21a4e	Firmicutes	Clostridia	Clostridiales	Lachnospiraceae	Clostridium
NG	3521cf575046d9249c5d0bcdc5a2eaa1	Firmicutes	Clostridia	Clostridiales	Lachnospiraceae
NG	4b8f9c4141c2ec34339680e981e409cd	Firmicutes	Clostridia	Clostridiales	Lachnospiraceae
NG	562654ec58186222c341936e7ff1f82c	Firmicutes	Clostridia	Clostridiales	Lachnospiraceae
NG	64ca65803b97525889e7607c1aeaef64	Firmicutes	Clostridia	Clostridiales	Lachnospiraceae
NG	665cf77fe4e20f3d809b716009c45013	Firmicutes	Clostridia	Clostridiales	Lachnospiraceae	Roseburia
NG	9496fec2565cbef69e99e590ab010689	Firmicutes	Clostridia	Clostridiales	Lachnospiraceae
NG	995523e90f6cb421b7ac979223605799	Firmicutes	Clostridia	Clostridiales	Lachnospiraceae
NG	abab79e1fe980733546408cbf9fdbc0b	Firmicutes	Clostridia	Clostridiales	Lachnospiraceae	Dorea
NG	af849a4dae5a10136f008f623e1fb33b	Firmicutes	Clostridia	Clostridiales	Lachnospiraceae
NG	b3109319445008804b634d387d46f198	Firmicutes	Clostridia	Clostridiales	Lachnospiraceae
NG	b8974b0cd72b2a5079fa3d58eec0cce5	Firmicutes	Clostridia	Clostridiales	Lachnospiraceae	Coprococcus
NG	bd7fa538242e2349b0d400dc3f2ef77e	Firmicutes	Clostridia	Clostridiales	Lachnospiraceae	[Ruminococcus]	gnavus
NG	d0d00eeb4f8ca57fdd13cd1a744fcbde	Firmicutes	Clostridia	Clostridiales	Lachnospiraceae
NG	d8224527e62d14738a32c74f38e45060	Firmicutes	Clostridia	Clostridiales	Lachnospiraceae
NG	e368d24679804a8bea2bab39c2b3a555	Firmicutes	Clostridia	Clostridiales	Lachnospiraceae	Dorea
NG	eb0ce025f750ad5e9839dc3c10602d78	Firmicutes	Clostridia	Clostridiales	Lachnospiraceae
NG	fbc50a8a333a1c1cb09f369f7f0f7bbe	Firmicutes	Clostridia	Clostridiales	Lachnospiraceae	Dorea
NG	ff067bb1428ba11a1250d867cb744298	Firmicutes	Clostridia	Clostridiales	Lachnospiraceae
NG	29bc25fbae29180b45976abd2a3a116d	Firmicutes	Erysipelotrichi	Erysipelotrichales	Erysipelotrichaceae	Anaerorhabdus	furcosa
NG	5ca969e4e49c2150a3ab00f75e94daa0	Firmicutes	Erysipelotrichi	Erysipelotrichales	Erysipelotrichaceae
NG	69d0f6b87c9018be06eef776c8b6f989	Firmicutes	Erysipelotrichi	Erysipelotrichales	Erysipelotrichaceae	Anaerorhabdus	furcosa
NG	7ef65e7a88f775b4ad3e4ebcb448e331	Firmicutes	Erysipelotrichi	Erysipelotrichales	Erysipelotrichaceae	Coprobacillus
NG	dc7dc6d036a3e4c7da76d9e33bbf8c78	Firmicutes	Erysipelotrichi	Erysipelotrichales	Erysipelotrichaceae
NG	e03f9292fb2b629dac6e6bd40704b2de	Firmicutes	Erysipelotrichi	Erysipelotrichales	Erysipelotrichaceae	Clostridium	ramosum
NG	ecb83c1fd0d885366790df39ff61e472	Firmicutes	Erysipelotrichi	Erysipelotrichales	Erysipelotrichaceae
NG	f5ccb8e6959c242ae9753b5d77edfec4	Firmicutes	Erysipelotrichi	Erysipelotrichales	Erysipelotrichaceae
NG	9ddbb9f3235a4d49679636c03acd5186	Proteobacteria	Deltaproteobacteria	Desulfovibrionales	Desulfovibrionaceae	Desulfovibrio
NG	ad82b6c42a951f8c5940494b1c4c1877	Proteobacteria	Deltaproteobacteria	Desulfovibrionales	Desulfovibrionaceae
NG	eb26eefda4af0aeca7432a7561cc8d36	Actinobacteria	Coriobacteriia	Coriobacteriales	Coriobacteriaceae
NG	16581f1341159085917e0b0c14834b12	Firmicutes	Clostridia	Clostridiales	Christensenellaceae
NG	03d8e905c3acd9038bbea399fc9afea4	Bacteroidetes	Bacteroidia	Bacteroidales	Bacteroidaceae	Bacteroides
NG	0c66d5e224490b5fe7b5f9ee9ab6166e	Bacteroidetes	Bacteroidia	Bacteroidales	Bacteroidaceae	Bacteroides
NG	28577d0c3cdd6e00da06f83a3bb164f7	Bacteroidetes	Bacteroidia	Bacteroidales	Bacteroidaceae	Bacteroides
NG	411d5a652e0c5bed13f0e0bf184d918b	Bacteroidetes	Bacteroidia	Bacteroidales	Bacteroidaceae	Bacteroides
NG	428829cca0363b191c80f561f314f3ae	Bacteroidetes	Bacteroidia	Bacteroidales	Bacteroidaceae	Bacteroides
NG	500f586b82a340be51437db122efe58f	Bacteroidetes	Bacteroidia	Bacteroidales	Bacteroidaceae	Bacteroides
NG	615921a2952ff64b4b39e2630a18d479	Bacteroidetes	Bacteroidia	Bacteroidales	Bacteroidaceae	Bacteroides
NG	c5e2344e6a032cd4d7db4c73bbfafd32	Bacteroidetes	Bacteroidia	Bacteroidales	Bacteroidaceae	Bacteroides
NG	edeb07eb88e61abf3b088ed158b281ed	Bacteroidetes	Bacteroidia	Bacteroidales	Bacteroidaceae	Bacteroides
NG	af6834e6719155b144e4649c1ae805fe	Tenericutes	Mollicutes	Anaeroplasmatales	Anaeroplasmataceae	Anaeroplasma
NG	db2b5228af3edc1ec960afff42527116	Bacteroidetes	Bacteroidia	Bacteroidales	[Odoribacteraceae]	Odoribacter
NG	5b776dbaa20108557e01c959eb7c1bd1	Firmicutes	Clostridia	Clostridiales	[Mogibacteriaceae]
NG	2aaae3842fd8be509b775740a4ec787e	Firmicutes	Clostridia	Clostridiales
NG	2c4aee95cb2e0deb355f1e0afb3c7626	Firmicutes	Clostridia	Clostridiales
NG	4989fa9089225629c4007e53d3a3714f	Firmicutes	Clostridia	Clostridiales
NG	6bb53cd3333a71f68d7ecabbabd58418	Firmicutes	Clostridia	Clostridiales
NG	76e5dafdee60ea522da07bccf36758c7	Firmicutes	Clostridia	Clostridiales
NG	86d33f33b14662a6a4e033d0b540278a	Firmicutes	Clostridia	Clostridiales
NG	9bdbdf13a20c41052da53de3b4436ab8	Firmicutes	Clostridia	Clostridiales
NG	a4b929d25334c34eb18fca9a5669ed52	Firmicutes	Clostridia	Clostridiales
NG	d4ede4f69b87950cfc2a677dd7fc0d15	Firmicutes	Clostridia	Clostridiales
NG	e7782b6827bb042621b9d8271e8a6660	Firmicutes	Clostridia	Clostridiales
NG	e68f6ba852e82281e53b2bb128f04731	Proteobacteria	Alphaproteobacteria	Rickettsiales
