# Supplementary material for: Insular holobionts: persistence and seasonal plasticity of the Balearic wall lizard (Podarcis lilfordi) gut microbiota
Source: PeerJ. 2023 Jan 3;11:e14511. doi: 10.7717/peerj.14511 (PMC9817956; doi:10.7717/peerj.14511)
Supplement: Supplemental Information 7 [file peerj-11-14511-s007.xlsx]

## Sheet: Sheet1
Table S8: List of ASVs that signifcantly discriminated between seasons within single islets (NG and NM) according to both indval and LEfSe analyses
	LEFSE				INDVAL	Indval			Relfreq		Relabund		Taxonomy
ASV	log_high_class	Class	LDA	p.value	Islet	Autumn	Spring	pval	Autumn	Spring	Autumn	Spring	Phylum	Class	Order	Family	Genus	Species
605ab0359371a294f8108c26d4c4230a	3.4498	Spring	3.04474	0.000105134	NG	0.03	0.73	0	0.24	0.83	0.12	0.88	Firmicutes	Clostridia	Clostridiales	Ruminococcaceae
7ef1f0e4c8d4afe5d15893fa737a4ee1	4.23786	Spring	3.69165	0.0011102	NG	0.07	0.59	0	0.24	0.83	0.29	0.71	Firmicutes	Clostridia	Clostridiales
866d02483b53b5ecc63102c27534ceef	3.46102	Spring	3.13871	0.000126794	NG	0.01	0.75	0	0.19	0.78	0.03	0.97	Firmicutes	Clostridia	Clostridiales	Ruminococcaceae	Ruminococcus
8771b6279e16fc8aa2e2ba2646b03e33	3.90417	Spring	3.59748	0.000666346	NG	0.02	0.8	0	0.48	0.83	0.04	0.96	Firmicutes	Clostridia	Clostridiales	Lachnospiraceae
95ea322f33388879b977a9c7e71c584e	4.04242	Spring	3.76207	0.000242769	NG	0	0.61	0	0	0.61	0	1	Tenericutes	Mollicutes	Anaeroplasmatales	Anaeroplasmataceae
d8accc5224fcea846f8d2647b1bd3ae9	3.50949	Spring	3.09709	0.000714101	NG	0.04	0.57	0	0.29	0.67	0.14	0.86	Bacteroidetes	Bacteroidia	Bacteroidales	Rikenellaceae
edbd029a7d064892a5ca5a1c4fbcb09b	3.93686	Spring	3.57744	0.000256502	NG	0.03	0.76	0	0.33	0.83	0.09	0.91	Bacteroidetes	Bacteroidia	Bacteroidales	Rikenellaceae
ef5a2ca667bd274b643f1e1d4458a955	4.14207	Spring	3.71147	0.000187375	NG	0.05	0.73	0	0.29	0.89	0.18	0.82	Bacteroidetes	Bacteroidia	Bacteroidales	[Odoribacteraceae]	Odoribacter
1e704442d9676b27608745f8c00c7860	3.95308	Fall	3.56671	5.09e-05	NG	0.84	0.1	0	1	0.61	0.84	0.16	Firmicutes	Clostridia	Clostridiales	Lachnospiraceae
2c4aee95cb2e0deb355f1e0afb3c7626	4.3096	Fall	3.96256	0.000536734	NG	0.88	0.09	0	1	0.78	0.88	0.12	Firmicutes	Clostridia	Clostridiales
4b8f9c4141c2ec34339680e981e409cd	3.60626	Fall	3.0083	0.00189167	NG	0.77	0.22	0	1	0.94	0.77	0.23	Firmicutes	Clostridia	Clostridiales	Lachnospiraceae
4cadfae87ff6ef42975e04007f97c972	3.94712	Fall	3.45052	0.00049385	NG	0.73	0.27	0	1	1	0.73	0.27	Firmicutes	Clostridia	Clostridiales	Ruminococcaceae	Oscillospira
59e3f9a4091eac22ffe16b2167af6bfa	3.9127	Fall	3.58565	0.00036204	NG	0.86	0.05	0	0.95	0.56	0.9	0.1	Firmicutes	Clostridia	Clostridiales	Lachnospiraceae
6b10014e0bf7c76d6096fba0e5055f3a	3.56392	Fall	3.2001	0.00323598	NG	0.66	0.02	0	0.71	0.22	0.92	0.08	Bacteroidetes	Bacteroidia	Bacteroidales	Porphyromonadaceae	Parabacteroides	Parabacteroides gordonii
995523e90f6cb421b7ac979223605799	4.24312	Fall	3.87412	0.000152926	NG	0.84	0.08	0	0.95	0.72	0.88	0.12	Firmicutes	Clostridia	Clostridiales	Lachnospiraceae
af849a4dae5a10136f008f623e1fb33b	3.45546	Fall	3.0816	0.00576556	NG	0.88	0.05	0	0.95	0.67	0.93	0.07	Firmicutes	Clostridia	Clostridiales	Lachnospiraceae
b0d703f37798eb4720000dbb35113165	3.55573	Fall	3.1446	0.00191881	NG	0.72	0.1	0	0.9	0.5	0.79	0.21	Firmicutes	Clostridia	Clostridiales	Lachnospiraceae
deb69b52e59acc99e6941d9c97f469f0	3.79017	Fall	3.4001	6.44e-05	NG	0.82	0.06	0	0.9	0.61	0.9	0.1	Firmicutes	Clostridia	Clostridiales	Lachnospiraceae
f11e992935bfb9edcd1c151eec52970a	4.04331	Fall	3.69875	6.44e-05	NG	0.9	0.07	0	1	0.72	0.9	0.1	Firmicutes	Erysipelotrichi	Erysipelotrichales	Erysipelotrichaceae
f5ccb8e6959c242ae9753b5d77edfec4	4.04349	Fall	3.6188	3.7e-05	NG	0.83	0.17	0	1	1	0.83	0.17	Firmicutes	Erysipelotrichi	Erysipelotrichales	Erysipelotrichaceae
0070c81cb25fd9a1dec14534c39aef0a	3.53106	Spring	3.12459	0.00643251	NM	0.1	0.72	0	0.55	0.88	0.17	0.83	Firmicutes	Clostridia	Clostridiales	Lachnospiraceae	Clostridium
38ce9310bd47517f19bf91451f371907	3.41566	Spring	3.0917	0.000939268	NM	0.03	0.69	0	0.41	0.75	0.07	0.93	Bacteroidetes	Bacteroidia	Bacteroidales	[Odoribacteraceae]	Odoribacter
a058e645f47175cd6d59b24705cc73dd	3.69659	Spring	3.37201	3.38e-05	NM	0.01	0.72	0	0.31	0.75	0.04	0.96	Bacteroidetes	Bacteroidia	Bacteroidales	[Odoribacteraceae]	Odoribacter
d0d00eeb4f8ca57fdd13cd1a744fcbde	3.97872	Spring	3.59698	2.34e-05	NM	0.05	0.91	0	0.59	1	0.09	0.91	Firmicutes	Clostridia	Clostridiales	Lachnospiraceae
d96e00dd528c1e3a12f8103877bc6f07	3.49929	Spring	3.06251	0.00166604	NM	0.1	0.69	0.01	0.48	0.88	0.22	0.78	Firmicutes	Clostridia	Clostridiales	Lachnospiraceae
1e704442d9676b27608745f8c00c7860	3.95814	Fall	3.55561	0.0031083	NM	0.69	0.12	0.01	0.83	0.69	0.83	0.17	Firmicutes	Clostridia	Clostridiales	Lachnospiraceae
21bdcdbf32275700cf3fe244e64d30c1	3.67087	Fall	3.29255	4.39e-05	NM	0.72	0.11	0	0.9	0.56	0.8	0.2	Firmicutes	Clostridia	Clostridiales	Ruminococcaceae
2c4aee95cb2e0deb355f1e0afb3c7626	4.16194	Fall	3.7981	0.00192075	NM	0.85	0.11	0	0.97	0.94	0.88	0.12	Firmicutes	Clostridia	Clostridiales
629600e92b9175ac52e765ca4824a8a2	3.8423	Fall	3.50791	5.04e-06	NM	0.95	0.04	0	1	0.75	0.95	0.05	Firmicutes	Clostridia	Clostridiales	Ruminococcaceae	Oscillospira
76e5dafdee60ea522da07bccf36758c7	3.94714	Fall	3.5683	0.000203205	NM	0.75	0.06	0.01	0.86	0.44	0.87	0.13	Firmicutes	Clostridia	Clostridiales
929697b6c6b38ec9296c15a78ef858a1	3.68993	Fall	3.3157	0.000584603	NM	0.8	0.17	0	1	0.88	0.8	0.2	Firmicutes	Clostridia	Clostridiales	Ruminococcaceae	Oscillospira
